# Supplementary material for: Pyridylidene ligand facilitates gold-catalyzed oxidative C–H arylation of heterocycles
Source: publisher site journal article supplement (doi:10.3762/bjoc.11.295), 2015-12-28

**Supporting Information**  
for  
**Pyridylidene ligand facilitates gold-catalyzed  
oxidative C–H arylation of heterocycles**

Kazuhiro Hata<sup>1</sup>, Hideto Ito<sup>1</sup>, Yasutomo Segawa\*<sup>1,2</sup> and Kenichiro Itami\*<sup>1,2,3</sup>

Address: 1Graduate School of Science, Nagoya University, Chikusa, Nagoya 464-8602, Japan, 2JST, ERATO, Itami Molecular Nanocarbon Project, Nagoya University, Chikusa, Nagoya 464-8602, Japan and 3Institute of Transformative Bio-Molecules (WPI-ITbM), Nagoya University, Chikusa, Nagoya 464-8602, Japan

Email: Yasutomo Segawa - ysegawa@nagoya-u.jp; Kenichiro Itami - itami@chem.nagoya-u.ac.jp

\* Corresponding author

**Experimental procedures, spectra of new compounds, CIF data, and details of the  
computational study**

**Table of Contents**

|                                                                                                                   |     |
|-------------------------------------------------------------------------------------------------------------------|-----|
| General                                                                                                           | S2  |
| Preparation of (triarylpyridylidene)gold chloride                                                                 | S3  |
| Oxidation of (triarylpyridylidene)gold chloride                                                                   | S3  |
| In situ observation and isolation of (triarylpyridylidene)gold trichloride                                        | S4  |
| General procedure for triarylpyridylidene-gold-catalyzed oxidative C–H arylation of heteroarenes with arylsilanes | S4  |
| General procedure for GC analysis of reaction profiles of each reaction component                                 | S5  |
| Characterization of new compounds                                                                                 | S6  |
| X-ray crystallography                                                                                             | S11 |
| Computational study                                                                                               | S13 |
| References                                                                                                        | S16 |
| <sup>1</sup> H and <sup>13</sup> C NMR spectra                                                                    | S17 |

## General

Unless otherwise noted, all materials including dry solvents were purchased from commercial suppliers and used without further purification. All reactions were performed using standard vacuum-line, Schlenk techniques, and screw cap tube. Work-up and purification procedures were carried out with reagent-grade solvents under air.

Analytical thin-layer chromatography (TLC) was carried out on Merck silica gel 60 F<sub>254</sub> plates; detection by UV or dipping into a solution of Ce(SO<sub>4</sub>)<sub>2</sub>·H<sub>2</sub>O (10 g), phosphomolybdic acid hydrate (25 g), conc. H<sub>2</sub>SO<sub>4</sub> (60 mL) and H<sub>2</sub>O (0.94 L) or NaHCO<sub>3</sub> (5.0 g), KMnO<sub>4</sub> (1.5 g) and H<sub>2</sub>O (0.20 L) followed by heating. Flash chromatography (FC) was carried out on Merck or KANTO silica gel 60 (40–100 μm) with an air pressure of about 1.1–1.5 bar. Preparative thin-layer chromatography (PTLC) was performed using Wako-gel<sup>®</sup> B5-F silica coated plates (0.75 mm) prepared in our laboratory. High-resolution mass spectra (HRMS) were measured on a Thermo Fisher Exactive Plus spectrometer (ESI) and (APCI). Nuclear magnetic resonance (NMR) spectra were recorded on JEOL JNM-ECA-600 (<sup>1</sup>H: 600 MHz, <sup>13</sup>C: 150 MHz). Chemical shifts for <sup>1</sup>H NMR are expressed in parts per million (ppm) relative to CHCl<sub>3</sub> (δ 7.26 ppm). Chemical shifts for <sup>13</sup>C NMR are expressed in ppm relative to CHCl<sub>3</sub> (δ 77.0 ppm). Data are reported as follows: chemical shift, multiplicity (s = singlet, d = doublet, dd = doublet of doublets, dt = doublet of triplets, t = triplet, m = multiplet), coupling constant (Hz), and integration.

## Preparation of (triarylpyridylidene)gold chloride [AuCl(PyC)]

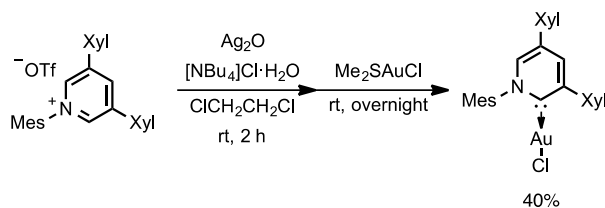

Silver(I) oxide (232 mg, 1.0 mmol) was added into a reaction vessel filled with an 1,2-dichloroethane (5.0 mL) solution of 3,5-bis(2,6-dimethylphenyl)-1-mesityl-pyridinium triflate·toluene<sup>S1</sup> (648 mg, 1.0 mmol) and tetrabutylammonium chloride hydrate (1.4 g, 5.0 mmol) under N<sub>2</sub> atmosphere. The reaction mixture was stirred at room temperature in dark until the silver(I) oxide powder disappeared (1–2 h) before chloro(dimethylsulfide)gold(I) was added. Further stirring overnight afforded a yellow solution and a black solid. Addition of chloroform (10 mL) gave an insoluble white precipitation, and these solids were removed by Celite<sup>®</sup> filtration and the filtrate was concentrated under reduced pressure. The crude oily mixture was purified by column chromatography on silica gel with chloroform/methanol (20:1) as the eluents and the fractions were concentrated under reduced pressure. Reprecipitation from chloroform/toluene gave colorless microcrystals. Further purification was conducted by recrystallization from chloroform/toluene to produce AuCl(PyC)·toluene as white crystals (281 mg, 0.40 mmol, 40% yield). Toluene in the crystal was removed by evaporation of chloroform solution. The characterization data for compound AuCl(PyC) corresponded to the reported values.<sup>S1</sup>

## Oxidation of (triarylpyridylidene)gold chloride

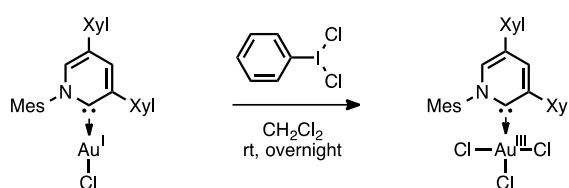

Oxidation of AuCl(PyC) was performed according to the literature.<sup>S2</sup> dichloro(phenyl)-λ<sup>3</sup>-iodane (55 mg, 0.20 mmol) was added into the solution of AuCl(PyC) (128 mg, 0.200 mmol) in dichloromethane (2.0 mL) under N<sub>2</sub> atmosphere. The reaction mixture was stirred at room temperature for 19 h and was filtered through a pad of Celite<sup>®</sup>. The filtrate was poured into hexane and the resulting precipitate was collected by filtration to obtain pure AuCl<sub>3</sub>(PyC) as a white solid (140 mg, 99%). A colorless single crystal for X-ray diffraction analysis was obtained by recrystallization from nitrobenzene and pentane.

## In situ observation and isolation of (triarylpyridylidene)gold trichloride

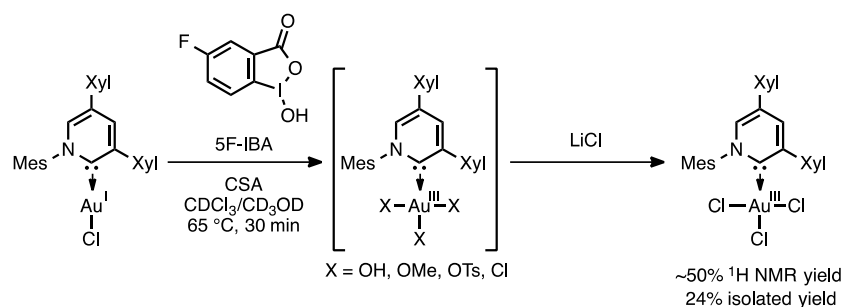

$\text{AuCl(PyC)}$  (13 mg, 20  $\mu\text{mol}$ ), 5-fluoro-2-iodosobenzoic acids (5F-IBA) (5.6 mg, 20  $\mu\text{mol}$ ) and (+)-10-camphorsulfonic acid (CSA) (4.6 mg, 20  $\mu\text{mol}$ ) were placed in a screw NMR tube, and  $\text{CDCl}_3/\text{CD}_3\text{OD}$  (10:1, 0.60 mL) was added under  $\text{N}_2$  atmosphere. The tube was sealed with a cap equipped with a Teflon<sup>®</sup>-coated silicon rubber septum, and heated at  $65\text{ }^\circ\text{C}$  for 30 min. After cooling to room temperature, lithium chloride (8.4 mg, 0.20 mmol) was added. Then 1,1,2,2-tetrachloroethane (an internal standard) was added and the NMR yield of  $\text{AuCl}_3(\text{PyC})$  was estimated by  $^1\text{H}$  NMR. The solvent was removed in vacuo, and the residue was dissolved in ethyl acetate, the organic layer was washed with saturated  $\text{NaHCO}_3$  aq, and brine, dried over  $\text{Na}_2\text{SO}_4$ , filtrated and concentrated in vacuo to afford a crude mixture. The crude mixture was further washed with  $\text{Et}_2\text{O}$  to give pure  $\text{AuCl}_3(\text{PyC})$  as white powder (3.4 mg, 24%).

## General procedure for triarylpyridylidene-gold-catalyzed oxidative C–H arylation of heteroarenes with arylsilanes

Triarylpyridylidene-gold complex  $\text{AuCl(PyC)}$  (6.4 mg, 10  $\mu\text{mol}$ , 5 mol %), heteroarene (0.20 mmol), and aryl(trimethyl)silane (0.20 mmol), 2-iodosobenzoic acids (IBA) (53 mg, 0.20 mmol), (+)-10-camphorsulfonic acid (CSA) (47 mg, 0.20 mmol) and a stirring bar were placed in a screw test tube, and dry chloroform/methanol (1.0 mL/0.10 mL) was added under  $\text{N}_2$  atmosphere. The tube was sealed with a cap equipped with a Teflon<sup>®</sup>-coated silicon rubber septum, and the mixture was stirred at  $65\text{ }^\circ\text{C}$  for 18–48 h. The reaction was quenched by addition of excess saturated  $\text{NaHCO}_3$  aq, the aqueous layer was extracted with dichloromethane and the combined organic layers were dried over  $\text{Na}_2\text{SO}_4$ , filtrated, and concentrated under reduced pressure. The residue was purified by flash chromatography (FC) to afford the coupling product.

## General procedure for GC analysis of reaction profiles of each reaction component

A gold complex [AuCl(ligand)] (25  $\mu\text{mol}$ , 5 mol %), 5-methylisoxazole (**1b**) (42 mg, 0.50 mmol), (4-bromophenyl)(trimethyl)silane (**2a**) (115 mg, 0.50 mmol), 2-iodosobenzoic acids (IBA) (132 mg, 0.50 mmol), (+)-10-camphorsulfonic acid (CSA) (116 mg, 0.50 mmol), the internal standard (nonane, 50  $\mu\text{L}$ ) and a stirring bar were placed in a Schlenk tube, and dry chloroform/methanol (5.0 mL/0.50 mL) solution was added under  $\text{N}_2$  atmosphere. The tube was sealed with a glass stopper, and the mixture was stirred at 65  $^\circ\text{C}$ . A tiny portion of reaction mixture was taken with a capillary under  $\text{N}_2$  atmosphere, and its diluted solution was analyzed by GC.

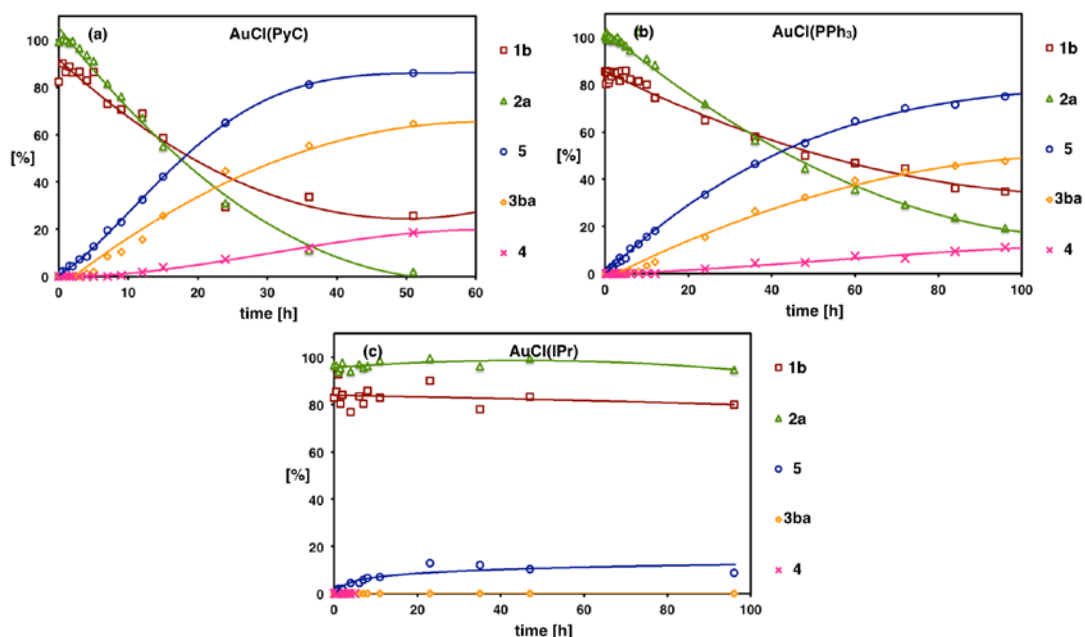

**Figure S:** Time-yield/consumption profiles of 5-methylisoxazole (**1b**), (4-bromophenyl)(trimethyl)silane (**2a**), 4-(4-bromophenyl)-5-methylisoxazole (**3ba**), methyl 2-iodobenzoate (**5**) and 4,4'-dibromobiphenyl (**4**) with (a) AuCl(PyC), (b) AuCl(PPh<sub>3</sub>) and (c) AuCl(IPr). All yields were determined by GC analysis with *n*-nonane as an internal standard

## Characterization of new compounds

[3,5-Bis(2,6-dimethylphenyl)-1-mesityl-pyridylidene]gold trichloride [AuCl<sub>3</sub>(PyC)]

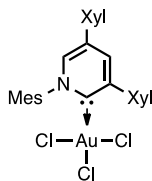

<sup>1</sup>H NMR (CDCl<sub>3</sub>, 600 MHz) δ 8.17 (d, *J* = 2.1 Hz, 1H), 7.90 (d, *J* = 2.1 Hz, 1H), 7.29 (td, *J* = 7.6, 2.7 Hz, 2H), 7.19 (d, *J* = 7.6 Hz, 2H), 7.16 (d, *J* = 7.6 Hz, 2H), 7.07 (s, 2H), 2.36 (s, 3H), 2.28 (s, 12H), 2.15 (s, 6H); <sup>13</sup>C NMR (CDCl<sub>3</sub>, 150 MHz) δ 162.5 (CH), 149.6 (4°), 146.6 (CH), 144.7 (CH), 141.9 (4°), 141.5 (4°), 138.5 (4°), 136.4 (4°), 135.62 (4°), 135.58 (4°), 133.2 (4°), 132.2 (4°), 130.4 (CH), 129.9 (CH), 129.7 (CH), 128.32 (4°), 128.29 (CH), 22.1 (CH<sub>3</sub>), 21.1 (CH<sub>3</sub>), 20.9 (CH<sub>3</sub>), 19.3 (CH<sub>3</sub>); HRMS (ESI+) calcd for C<sub>31</sub>H<sub>35</sub>AuCl<sub>2</sub>NO [M-Cl+MeOH]<sup>+</sup>: *m/z* 704.1756, found: 704.1722.

### 4-(4-Bromophenyl)isoxazole (**3aa**)

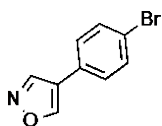

**3aa** was prepared according to the general procedure, employing isoxazole (**1a**) (14 mg, 0.20 mmol) and (4-bromophenyl)(trimethyl)silane (**2a**) (46 mg, 0.20 mmol) for 18 h. FC (hexane/ethyl acetate = 20:1 to 10:1) gave **3aa** as a pale yellow solid (6.1 mg, 0.027 mmol, 14%).

<sup>1</sup>H NMR (CDCl<sub>3</sub>, 600 MHz) δ 8.67 (s, 1H), 8.53 (s, 1H), 7.56–7.53 (m, 2H), 7.36–7.33 (m, 2H); <sup>13</sup>C NMR (CDCl<sub>3</sub>, 150 MHz) δ 153.5 (CH), 147.7 (CH), 132.3 (CH), 127.9 (CH), 127.5 (4°), 122.0 (4°), 120.4 (4°); HRMS (ESI+) calcd for C<sub>9</sub>H<sub>7</sub>BrNO [M+H]<sup>+</sup>: *m/z* 223.9706, found: *m/z* 223.9695.

### 4-(4-Fluorophenyl)isoxazole (**3ab**)

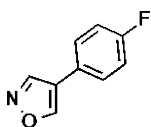

**3ab** was prepared according to the general procedure, employing isoxazole (**1a**) (14 mg, 0.20 mmol) and (4-fluorophenyl)(trimethyl)silane (**2b**) (37 mg, 0.20 mmol) for 24 h. FC (pentane/diethylether = 10:1) gave **3ab** as a pale yellow solid (4.9 mg, 0.030 mmol, 15%).

<sup>1</sup>H NMR (CDCl<sub>3</sub>, 600 MHz) δ 8.64 (s, 1H), 8.52 (s, 1H), 7.46–7.43 (m, 2H), 7.14–7.10 (m, 2H); <sup>13</sup>C NMR (CDCl<sub>3</sub>, 150 MHz) δ 162.5 (4°, *J* = 247 Hz), 153.2 (CH), 147.9 (CH), 128.2 (CH, *J* = 8.6 Hz), 124.7 (4°, *J* = 2.9 Hz), 120.5 (4°), 116.3 (CH, *J* = 21 Hz); HRMS (ESI+) calcd for C<sub>9</sub>H<sub>7</sub>FNO [M+H]<sup>+</sup>: *m/z* 164.0506, found: *m/z* 164.0500.

#### 4-(4-Bromophenyl)-5-methylisoxazole (**3ba**)

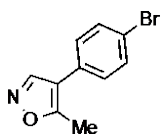

**3ba** was prepared according to the general procedure, employing 5-methylisoxazole (**1b**) (17 mg, 0.20 mmol) and (4-bromophenyl)(trimethyl)silane (**2a**) (46 mg, 0.20 mmol) for 24 h. FC (pentane/diethylether = 10:1) gave **3ba** as a pale yellow oil (26 mg, 0.11 mmol, 55%).

$^1\text{H}$  NMR ( $\text{CDCl}_3$ , 600 MHz)  $\delta$  8.31 (s, 1H), 7.25–7.23 (m, 2H), 2.55 (s, 3H);  $^{13}\text{C}$  NMR ( $\text{CDCl}_3$ , 150 MHz)  $\delta$  164.5 ( $4^\circ$ ), 149.8 (CH), 132.1 (CH), 129.0 ( $4^\circ$ ), 128.9 (CH), 121.4 ( $4^\circ$ ), 115.5 ( $4^\circ$ ), 11.8 ( $\text{CH}_3$ ); HRMS (ESI+) calcd for  $\text{C}_{10}\text{H}_9\text{BrNO}$  [ $\text{M}+\text{H}$ ] $^+$ :  $m/z$  237.9862, found:  $m/z$  237.9855.

#### 4-(4-Fluorophenyl)-5-methylisoxazole (**3bb**)

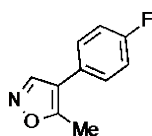

**3bb** was prepared according to the general procedure, employing 5-methylisoxazole (**1b**) (17 mg, 0.20 mmol) and (4-fluorophenyl)(trimethyl)silane (**2b**) (37 mg, 0.20 mmol) for 24 h. FC (pentane/diethylether = 10:1) gave **3bb** as a yellow oil (19 mg, 0.11 mmol, 54%).

$^1\text{H}$  NMR ( $\text{CDCl}_3$ , 600 MHz)  $\delta$  8.31 (s, 1H), 7.35–7.31 (m, 2H), 7.15–7.10 (m, 2H), 2.54 (s, 3H);  $^{13}\text{C}$  NMR ( $\text{CDCl}_3$ , 150 MHz)  $\delta$  164.2 ( $4^\circ$ ), 162.1 ( $4^\circ$ ,  $J = 247$  Hz), 150.0 (CH), 129.1 (CH,  $J = 8.6$  Hz), 126.1 ( $4^\circ$ ,  $J = 2.9$  Hz), 116.0 (CH,  $J = 22$  Hz), 115.6 ( $4^\circ$ ), 11.6 ( $\text{CH}_3$ ); HRMS (ESI+) calcd for  $\text{C}_{10}\text{H}_9\text{FNO}$  [ $\text{M}+\text{H}$ ] $^+$ :  $m/z$  178.0663, found:  $m/z$  178.0658.

#### 4-(4-Trifluoromethylphenyl)-5-methylisoxazole (**3bc**)

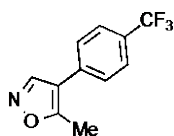

**3bc** was prepared according to the general procedure, employing 5-methylisoxazole (**1b**) (17 mg, 0.20 mmol) and (4-trifluoromethylphenyl)(trimethyl)silane (**2c**) (44 mg, 0.20 mmol) for 48 h. FC (hexane/ethyl acetate = 50:1 to 10:1) gave **3bc** as a colorless oil (15 mg, 0.066 mmol, 33%).

$^1\text{H}$  NMR ( $\text{CDCl}_3$ , 600 MHz)  $\delta$  8.39 (s, 1H), 7.70 (d,  $J = 7.2$  Hz, 2H), 7.50 (d,  $J = 8.4$  Hz, 2H), 2.60 (s, 3H);  $^{13}\text{C}$  NMR ( $\text{CDCl}_3$ , 150 MHz)  $\delta$  165.2 ( $4^\circ$ ), 149.8 (CH), 133.8 ( $4^\circ$ ), 129.6 ( $4^\circ$ ,  $J = 33$  Hz), 127.6 (CH), 126.0 (CH,  $J = 4.4$  Hz), 124.0 ( $4^\circ$ ,  $J = 270$  Hz), 115.4 ( $4^\circ$ ), 11.9 ( $\text{CH}_3$ ); HRMS (ESI+) calcd for  $\text{C}_{11}\text{H}_9\text{F}_3\text{NO}$   $[\text{M}+\text{H}]^+$ :  $m/z$  228.0631, found:  $m/z$  228.0622.

#### 4-(3,5-Dibromo)-5-methylisoxazole (**3bd**)

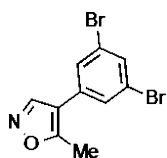

**3bd** was prepared according to the general procedure, employing 5-methylisoxazole (**1b**) (17 mg, 0.20 mmol) and (3,5-dibromophenyl)(trimethyl)silane (**2d**) (62 mg, 0.20 mmol) for 48 h. FC (hexane/ethylacetate = 50:1 to 10:1) gave **3bd** as a white solid (8.3 mg, 0.026 mmol, 13%).

$^1\text{H}$  NMR ( $\text{CDCl}_3$ , 600 MHz)  $\delta$  8.33 (s, 1H), 7.64 (t,  $J = 1.8$  Hz, 1H), 7.45 (d,  $J = 2.4$  Hz, 2H), 2.58 (s, 3H);  $^{13}\text{C}$  NMR ( $\text{CDCl}_3$ , 150 MHz)  $\delta$  165.3 ( $4^\circ$ ), 149.6 (CH), 133.6 ( $4^\circ$ ), 133.0 (CH), 129.1 (CH), 123.5 ( $4^\circ$ ), 114.2 ( $4^\circ$ ), 11.9 ( $\text{CH}_3$ ); HRMS (ESI+) calcd for  $\text{C}_{10}\text{H}_8\text{Br}_2\text{NO}$   $[\text{M}+\text{H}]^+$ :  $m/z$  317.8947, found:  $m/z$  317.8935.

#### 4-(4-Bromophenyl)-5-phenylisoxazole (**3ca**)

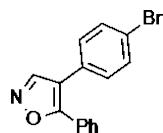

**3ca** was prepared according to the general procedure, employing 5-phenylisoxazole (**1c**) (29 mg, 0.20 mmol) and (4-bromophenyl)(trimethyl)silane (**2a**) (46 mg, 0.20 mmol) for 48 h. FC (hexane/ethyl acetate = 50:1 to 10:1) gave **3ca** as a white solid (17 mg, 0.057 mmol, 28%).

$^1\text{H}$  NMR ( $\text{CDCl}_3$ , 600 MHz)  $\delta$  8.34 (s, 1H), 7.61 (dd,  $J = 8.1, 1.5$  Hz, 2H), 7.54–7.51 (m, 2H), 7.45–7.38 (m, 3H), 7.27–7.24 (m, 2H);  $^{13}\text{C}$  NMR ( $\text{CDCl}_3$ , 150 MHz)  $\delta$  164.3 ( $4^\circ$ ), 151.5 (CH), 132.2 (CH), 130.3 (CH), 130.2 (CH), 129.0 ( $4^\circ$ ), 128.9 (CH), 127.3 ( $4^\circ$ ), 127.3 (CH), 122.2 ( $4^\circ$ ), 115.1 ( $4^\circ$ ); HRMS (ESI+) calcd for  $\text{C}_{15}\text{H}_{11}\text{BrNO}$   $[\text{M}+\text{H}]^+$ :  $m/z$  300.0019, found:  $m/z$  300.0004.



#### 4-(4-Bromophenyl)-3,5-dimethylisoxazole (**3da**)

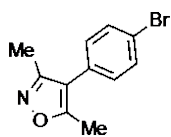

**3da** was prepared according to the general procedure, employing 3,5-dimethylisoxazole (**1d**) (19 mg, 0.20 mmol) and (4-bromophenyl)(trimethyl)silane (**2a**) (46 mg, 0.20 mmol) for 48 h. FC (pentane/dimethylether = 10:1) gave **3da** as a yellow solid (8.6 mg, 0.034 mmol, 17%).

$^1\text{H}$  NMR ( $\text{CDCl}_3$ , 600 MHz)  $\delta$  7.57 (d,  $J = 8.4$  Hz, 2H), 7.13 (d,  $J = 8.4$  Hz, 2H), 2.39 (s, 3H), 2.25 (s, 3H);  $^{13}\text{C}$  NMR ( $\text{CDCl}_3$ , 150 MHz)  $\delta$  165.3 ( $4^\circ$ ), 158.4 ( $4^\circ$ ), 132.0 (CH), 130.7 (CH), 129.4 ( $4^\circ$ ), 121.7 ( $4^\circ$ ), 115.7 ( $4^\circ$ ), 11.5 ( $\text{CH}_3$ ), 10.7 ( $\text{CH}_3$ ); HRMS (ESI+) calcd for  $\text{C}_{11}\text{H}_{11}\text{BrNO}$   $[\text{M}+\text{H}]^+$ :  $m/z$  252.0019, found:  $m/z$  252.0009.

#### 3-(4-Bromophenyl)-*N*-tosylindole (**3ea**)

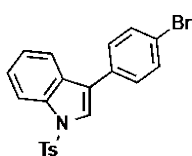

**3ea** was prepared according to the general procedure, employing *N*-*p*-toluenesulfonylindole (**1e**) (54 mg, 0.20 mmol) and (4-bromophenyl)(trimethyl)silane (**2a**) (46 mg, 0.20 mmol) for 48 h. FC (pentane/dimethylether = 10:1) gave **3ea** as a white solid (38 mg, 0.088 mmol, 44%).

$^1\text{H}$  NMR ( $\text{CDCl}_3$ , 600 MHz)  $\delta$  8.07 (d,  $J = 8.4$  Hz, 1H), 7.82 (d,  $J = 8.4$  Hz, 2H), 7.72 (d,  $J = 8.4$  Hz, 1H), 7.70 (s, 1H), 7.59 (d,  $J = 8.4$  Hz, 2H), 7.47 (d,  $J = 8.4$  Hz, 2H), 7.38 (t,  $J = 8.1$  Hz, 1H), 7.30 (t,  $J = 7.5$  Hz, 1H), 7.24 (d,  $J = 8.4$  Hz, 2H), 2.34 (s, 3H);  $^{13}\text{C}$  NMR ( $\text{CDCl}_3$ , 150 MHz)  $\delta$  145.1 ( $4^\circ$ ), 135.4 ( $4^\circ$ ), 135.1 ( $4^\circ$ ), 132.0 (CH), 130.0 (CH), 129.4 (CH), 128.9 ( $4^\circ$ ), 126.9 (CH), 125.0 (CH), 123.7 (CH), 123.0 (CH), 122.7 ( $4^\circ$ ), 121.4 ( $4^\circ$ ), 120.1 (CH), 113.9 (CH), 21.6 ( $\text{CH}_3$ ), one  $4^\circ$  carbon peak should be overlapped; HRMS (ESI+) calcd for  $\text{C}_{21}\text{H}_{17}\text{BrNO}_2\text{S}$   $[\text{M}+\text{H}]^+$ :  $m/z$  426.0158, found:  $m/z$  426.0139.

#### 2-(4-Bromophenyl)-benzo[*b*]thiophene (**3fa**) and 3-(4-bromophenyl)-benzo[*b*]thiophene (**3fa'**)

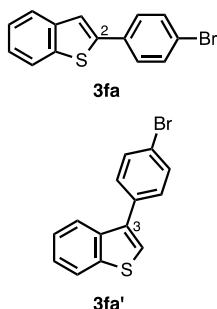

**3fa** was prepared according to the general procedure, employing benzo[*b*]thiophene (**1f**) (27 mg, 0.20 mmol) and (4-bromophenyl)(trimethyl)silane (**2a**) (46 mg, 0.20 mmol) for 48 h. FC (pentane) gave **3fa** as mixture of **3fa'** (a white solid, 13 mg, 0.044 mmol, 22%, **3fa**:**3fa'** = 83:17). The characterization data for compound **3fa'** corresponded to the reported values.<sup>S3</sup>

<sup>1</sup>H NMR of **3fa** (CDCl<sub>3</sub>, 600 MHz) δ 7.83 (d, *J* = 8.4 Hz, 1H), 7.78 (d, *J* = 7.2 Hz, 1H), 7.59–7.53 (m, 5H), 7.38–7.32 (m, 2H); <sup>13</sup>C NMR of **3fa** (CDCl<sub>3</sub>, 150 MHz) δ 142.9 (4°), 140.6 (4°), 139.5 (4°), 133.3 (4°), 132.1 (CH), 127.9 (CH), 124.7 (CH), 124.6 (CH), 123.7 (CH), 122.3 (CH), 122.2 (4°), 119.9 (CH); HRMS (APCI+) calcd for C<sub>14</sub>H<sub>9</sub>BrS [M]<sup>+</sup>: *m/z* 287.9603, found: *m/z* 287.9596.

## X-ray crystallography

Details of the crystal data and a summary of the intensity data collection parameters for AuCl<sub>3</sub>(PyC) are listed in Table S1. In each case, a suitable crystal was mounted with mineral oil on a glass fiber and transferred to the goniometer of a Rigaku Saturn CCD diffractometer. Graphite-monochromated Mo K $\alpha$  radiation ( $\lambda = 0.71075 \text{ \AA}$ ) was used. The structures were solved by direct methods with (SIR-97)<sup>S4</sup> and refined by full-matrix least-squares techniques against  $F^2$ (SHELXL-97).<sup>S5</sup> The intensities were corrected for Lorentz and polarization effects. Non-hydrogen atoms were refined anisotropically. Hydrogen atoms were placed using AFIX instructions. The data can be obtained free of charge from The Cambridge Crystallographic Data Centre via [www.ccdc.cam.ac.uk/data\\_request/cif](http://www.ccdc.cam.ac.uk/data_request/cif) (CCDC 1045812).

**Table S1:** Crystallographic data and structure refinement details for compound ([AuCl<sub>3</sub>(PyC)]·PhNO<sub>2</sub>).

| [AuCl <sub>3</sub> (PyC)]·PhNO <sub>2</sub>                                           |                                                                                               |
|---------------------------------------------------------------------------------------|-----------------------------------------------------------------------------------------------|
| formula                                                                               | C <sub>72</sub> H <sub>70</sub> Au <sub>2</sub> Cl <sub>6</sub> N <sub>4</sub> O <sub>4</sub> |
| fw                                                                                    | 1661.95                                                                                       |
| T (K)                                                                                 | 103(2)                                                                                        |
| $\lambda$ (Å)                                                                         | 0.71075                                                                                       |
| Cryst syst                                                                            | Monoclinic                                                                                    |
| space group                                                                           | <i>C2/c</i>                                                                                   |
| <i>a</i> , (Å)                                                                        | 8.332(5)                                                                                      |
| <i>b</i> , (Å)                                                                        | 25.831(13)                                                                                    |
| <i>c</i> , (Å)                                                                        | 16.488(9)                                                                                     |
| $\alpha$ , [°]deg □                                                                   | 90                                                                                            |
| $\beta$ , [°]deg □                                                                    | 104.578(8)                                                                                    |
| $\gamma$ , [°]deg □                                                                   | 90                                                                                            |
| <i>V</i> , (Å <sup>3</sup> )                                                          | 3434(3)                                                                                       |
| <i>Z</i>                                                                              | 2                                                                                             |
| <i>D</i> <sub>calc</sub> , (g / cm <sup>3</sup> )                                     | 1.607                                                                                         |
| $\mu$ (mm <sup>-1</sup> )                                                             | 4.551                                                                                         |
| F(000)                                                                                | 1644                                                                                          |
| cryst size (mm)                                                                       | 0.10 × 0.10 × 0.05                                                                            |
| 2 $\theta$ range, (deg) □                                                             | 3.00–25.00                                                                                    |
| reflns collected                                                                      | 11449                                                                                         |
| indep reflns/ <i>R</i> <sub>int</sub>                                                 | 3024/0.0567                                                                                   |
| params                                                                                | 312                                                                                           |
| GOF on $F^2$                                                                          | 1.043                                                                                         |
| <i>R</i> <sub>1</sub> , w <i>R</i> <sub>2</sub> [ <i>I</i> > 2 $\sigma$ ( <i>I</i> )] | 0.0522, 0.1235                                                                                |
| <i>R</i> <sub>1</sub> , w <i>R</i> <sub>2</sub> (all data)                            | 0.0676, 0.1320                                                                                |

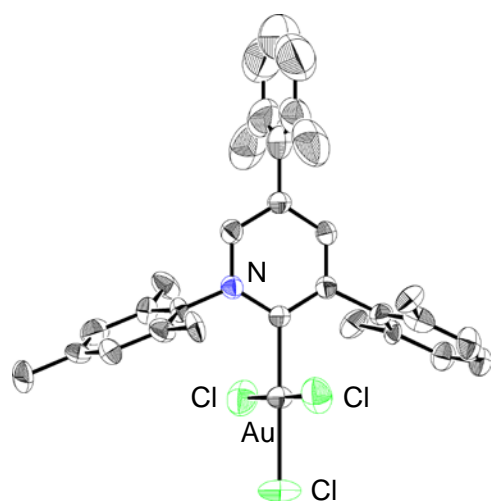

**Figure S2:** ORTEP drawing of  $\text{AuCl}_3(\text{PyC})$  with 50% probability. All hydrogen atoms and nitrobenzene molecule are omitted for clarity.

## Computational study

The Gaussian 09 program<sup>S6</sup> running on a SGI Altix4700 system was used for optimization (B3LYP/SDD<sup>S7</sup> for Au, 6-31G(d) for others). Structures were optimized without any symmetry assumptions. Zero-point energy, enthalpy, and Gibbs free energy at 298.15 K and 1 atm were estimated from the gas-phase studies. Harmonic vibration frequency calculation at the same level was performed to verify all stationary points as local minima (with no imaginary frequency). Visualization of the results was performed by use of GaussView 5.0.9 software.

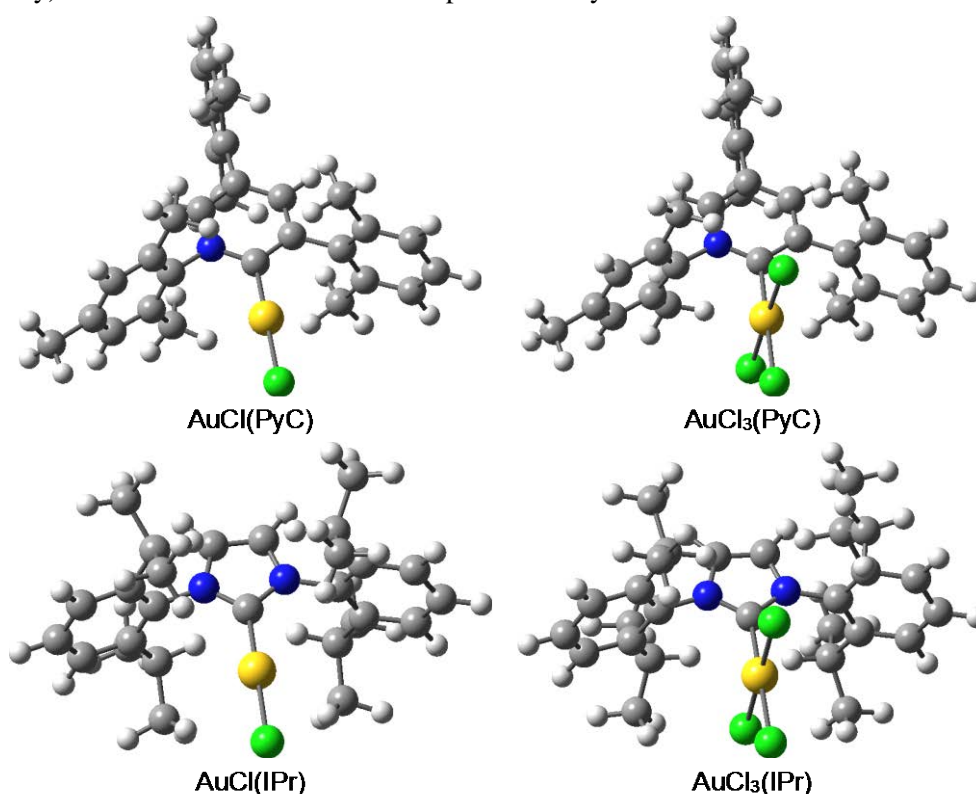

**Figure S3:** Optimized structures of gold complexes. C: gray, H: white, N: blue, Cl: green, Au: yellow.

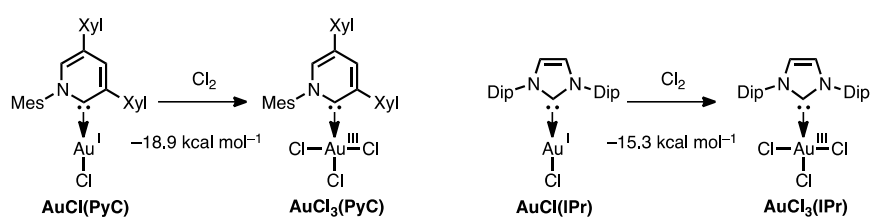

**Scheme S1:** Hypothetical reactions for estimation of the stability of gold(III) complexes.

**Table S2:** Uncorrected and thermal-corrected (298 K) energies of stationary points (Hartree).<sup>a</sup>

| compound                | $E$            | $E + ZPE$    | $H$          | $G$          |
|-------------------------|----------------|--------------|--------------|--------------|
| AuCl(PyC)               | -1812.67004697 | -1812.142233 | -1812.106688 | -1812.213402 |
| AuCl <sub>3</sub> (PyC) | -2733.05219302 | -2732.520790 | -2732.482012 | -2732.594673 |
| AuCl(IPr)               | -1756.11982458 | -1755.544370 | -1755.509197 | -1755.614045 |
| AuCl <sub>3</sub> (IPr) | -2676.49630661 | -2675.917036 | -2675.878847 | -2675.988002 |
| Cl <sub>2</sub>         | -920.349884457 | -920.348706  | -920.345190  | -920.370557  |

a)  $E$ : electronic energy;  $ZPE$ : zero-point energy;  $H (= E + ZPE + E_{\text{vib}} + E_{\text{rot}} + E_{\text{trans}} + RT)$ : sum of

electronic and thermal enthalpies;  $G (= H - TS)$ : sum of electronic and thermal free energies.

**Table S3:** Cartesian coordinates for the gold complexes and chlorine.

**AuCl(PyC)**

|   |           |           |           |   |           |           |           |    |           |           |           |
|---|-----------|-----------|-----------|---|-----------|-----------|-----------|----|-----------|-----------|-----------|
| C | -0.686338 | -1.334196 | 0.000074  | H | 1.223266  | -6.365996 | 0.000263  | H  | -1.171639 | -2.353408 | 2.657842  |
| C | -2.063553 | -1.144797 | -0.000006 | C | -4.120086 | 0.360864  | 0.000049  | H  | 0.084655  | -3.365845 | 3.384284  |
| C | -2.638692 | 0.143335  | 0.000055  | C | -4.811639 | 0.454251  | 1.226947  | C  | -0.134329 | -2.693286 | -2.549550 |
| C | -1.760980 | 1.205133  | 0.000144  | C | -4.811722 | 0.453554  | -1.226855 | H  | -1.172417 | -2.354162 | -2.657585 |
| H | -2.719914 | -2.011902 | -0.000100 | C | -6.198247 | 0.645302  | 1.205664  | H  | 0.507452  | -1.810153 | -2.656077 |
| H | -2.089884 | 2.237721  | 0.000232  | C | -6.198330 | 0.644602  | -1.205588 | H  | 0.084088  | -3.366350 | -3.383990 |
| C | 0.409028  | 2.230102  | 0.000026  | C | -6.889334 | 0.740583  | 0.000034  | C  | -4.086105 | 0.353314  | -2.550789 |
| C | 0.766753  | 2.800192  | 1.230823  | H | -6.737181 | 0.717838  | 2.146908  | H  | -3.366363 | 1.170655  | -2.684973 |
| C | 0.766391  | 2.800180  | -1.230884 | H | -6.737329 | 0.716591  | -2.146838 | H  | -3.520644 | -0.582125 | -2.638817 |
| C | 1.518795  | 3.978262  | 1.200578  | H | -7.965994 | 0.887549  | 0.000028  | H  | -4.792731 | 0.395463  | -3.384743 |
| C | 1.518447  | 3.978246  | -1.200873 | N | -0.407771 | 1.016310  | 0.000114  | C  | -4.085965 | 0.354556  | 2.550894  |
| C | 1.911466  | 4.577842  | -0.000209 | C | 0.389926  | 2.161686  | -2.546114 | H  | -3.521128 | -0.581212 | 2.639525  |
| H | 1.810675  | 4.433367  | 2.144205  | H | 0.893399  | 1.194853  | -2.667121 | H  | -3.365665 | 1.171498  | 2.684440  |
| H | 1.810074  | 4.433329  | -2.144589 | H | -0.688816 | 1.980539  | -2.627991 | H  | -4.792494 | 0.397757  | 3.384875  |
| C | -0.137436 | -2.730375 | 0.000118  | H | 0.685856  | 2.801438  | -3.382015 | C  | 2.761353  | 5.826604  | -0.000327 |
| C | 0.105071  | -3.384958 | -1.226089 | C | 0.390723  | 2.161702  | 2.546177  | H  | 3.828730  | 5.570546  | -0.000019 |
| C | 0.105420  | -3.384732 | 1.226380  | H | -0.687881 | 1.979793  | 2.628101  | H  | 2.573297  | 6.440327  | -0.887504 |
| C | 0.594564  | -4.695556 | -1.204923 | H | 0.894884  | 1.195244  | 2.667343  | H  | 2.572900  | 6.440763  | 0.886467  |
| C | 0.594924  | -4.695324 | 1.205313  | H | 0.686215  | 2.801813  | 3.381960  | C  | 0.200868  | -0.217526 | 0.000078  |
| C | 0.840058  | -5.349138 | 0.000220  | C | -0.133652 | -2.692825 | 2.549779  | Au | 2.211308  | -0.383949 | -0.000056 |
| H | 0.788817  | -5.202537 | -2.146734 | H | 0.508379  | -1.809854 | 2.656137  | Cl | 4.532043  | -0.589953 | -0.000229 |
| H | 0.789469  | -5.202121 | 2.147162  |   |           |           |           |    |           |           |           |

**AuCl<sub>3</sub>(PyC)**

|   |           |           |           |   |           |           |           |    |           |           |           |
|---|-----------|-----------|-----------|---|-----------|-----------|-----------|----|-----------|-----------|-----------|
| C | -0.852015 | -1.320809 | 0.075220  | H | 1.067140  | -6.348485 | 0.230580  | H  | 0.046875  | -3.236463 | 3.520291  |
| C | -2.238233 | -1.150297 | 0.076545  | C | -4.326226 | 0.303783  | -0.003606 | C  | -0.782144 | -2.952272 | -2.380877 |
| C | -2.841206 | 0.115626  | 0.007800  | C | -5.028008 | 0.369038  | 1.219276  | H  | -1.876528 | -2.850769 | -2.364795 |
| C | -1.985339 | 1.196166  | -0.048046 | C | -5.005699 | 0.400445  | -1.236872 | H  | -0.356182 | -1.976350 | -2.625778 |
| H | -2.871164 | -2.032480 | 0.126879  | C | -6.417094 | 0.537803  | 1.186756  | H  | -0.531979 | -3.637401 | -3.196176 |
| H | -2.336620 | 2.219471  | -0.098495 | C | -6.395496 | 0.567326  | -1.224948 | C  | -4.267130 | 0.326080  | -2.555492 |
| C | 0.136077  | 2.301160  | -0.060553 | C | -7.098251 | 0.636636  | -0.024329 | H  | -3.578727 | 1.170340  | -2.688493 |
| C | 0.344343  | 2.971083  | 1.156642  | H | -6.965650 | 0.590734  | 2.123590  | H  | -3.666113 | -0.587136 | -2.639377 |
| C | 0.524491  | 2.837636  | -1.299853 | H | -6.927453 | 0.641339  | -2.169898 | H  | -4.969379 | 0.340863  | -3.393852 |
| C | 1.087975  | 4.154182  | 1.114619  | H | -8.177052 | 0.766030  | -0.032440 | C  | -4.312004 | 0.262330  | 2.547952  |
| C | 1.261904  | 4.026001  | -1.275357 | N | -0.629499 | 1.045245  | -0.038343 | H  | -3.792060 | -0.697377 | 2.657842  |
| C | 1.581455  | 4.681292  | -0.082386 | C | 0.123979  | 2.220088  | -2.617541 | H  | -3.554720 | 1.046365  | 2.670265  |
| H | 1.281820  | 4.676784  | 2.048038  | H | 0.590440  | 1.242719  | -2.771255 | H  | -5.019123 | 0.351807  | 3.377476  |
| H | 1.586915  | 4.451480  | -2.221603 | H | -0.963683 | 2.084743  | -2.683420 | C  | 2.432057  | 5.928644  | -0.087696 |
| C | -0.315614 | -2.723528 | 0.126273  | H | 0.425893  | 2.869408  | -3.443810 | H  | 3.496452  | 5.670134  | -0.017015 |
| C | -0.259960 | -3.483640 | -1.064585 | C | -0.261883 | 2.504697  | 2.459230  | H  | 2.296604  | 6.503721  | -1.009648 |
| C | 0.029981  | -3.302000 | 1.368541  | H | -1.336455 | 2.734279  | 2.495389  | H  | 2.196780  | 6.579322  | 0.760879  |
| C | 0.250784  | -4.784941 | -1.004780 | H | -0.132433 | 1.432325  | 2.616436  | C  | -0.015040 | -0.177904 | 0.013574  |
| C | 0.532901  | -4.608560 | 1.380718  | H | 0.209743  | 3.018151  | 3.301168  | Au | 2.061010  | -0.308670 | -0.024243 |
| C | 0.664760  | -5.339447 | 0.203440  | C | -0.182246 | -2.576768 | 2.678069  | Cl | 2.014002  | -0.782012 | -2.337745 |
| H | 0.317519  | -5.366349 | -1.920528 | H | 0.454052  | -1.691382 | 2.768319  | Cl | 2.201595  | 0.132851  | 2.290896  |
| H | 0.814870  | -5.053809 | 2.331181  | H | -1.224321 | -2.248832 | 2.790435  | Cl | 4.417258  | -0.475197 | -0.085212 |

**AuCl(IPr)**

|   |           |          |           |   |          |           |           |   |           |           |           |
|---|-----------|----------|-----------|---|----------|-----------|-----------|---|-----------|-----------|-----------|
| C | 0.678108  | 0.000225 | -2.656979 | H | 1.370313 | 2.383433  | -1.187702 | H | -1.370154 | -2.383222 | -1.187814 |
| C | -0.678047 | 0.000267 | -2.656990 | C | 2.411053 | -2.578079 | -0.911683 | C | -3.044255 | 3.389541  | -2.059311 |
| H | 1.392082  | 0.000311 | -3.465262 | H | 1.369950 | -2.383252 | -1.187141 | H | -3.024100 | 2.833497  | -3.003849 |
| H | -1.392006 | 0.000392 | -3.465286 | C | 3.044760 | 3.389526  | -2.059394 | H | -4.089111 | 3.641219  | -1.843818 |
| C | 2.465223  | 0.000054 | -0.907902 | H | 4.089545 | 3.641236  | -1.843596 | H | -2.499657 | 4.329510  | -2.206439 |

|   |           |           |           |   |           |           |           |    |           |           |           |
|---|-----------|-----------|-----------|---|-----------|-----------|-----------|----|-----------|-----------|-----------|
| C | 3.113445  | -1.237086 | -0.723446 | H | 3.024895  | 2.833521  | -3.003962 | C  | -2.387480 | 3.389925  | 0.398843  |
| C | 3.113579  | 1.237126  | -0.723516 | H | 2.500179  | 4.329485  | -2.206642 | H  | -3.399796 | 3.652265  | 0.727671  |
| C | 4.461085  | -1.206400 | -0.344884 | C | 2.387319  | 3.389782  | 0.398585  | H  | -1.905887 | 2.825702  | 1.204116  |
| C | 4.461215  | 1.206314  | -0.344948 | H | 1.905469  | 2.825532  | 1.203685  | H  | -1.832556 | 4.324434  | 0.253712  |
| C | 5.129930  | -0.000073 | -0.157312 | H | 3.399558  | 3.652040  | 0.727717  | C  | -3.044511 | -3.389128 | -2.059926 |
| H | 4.990671  | -2.141817 | -0.189795 | H | 1.832483  | 4.324330  | 0.253352  | H  | -4.089336 | -3.640827 | -1.844305 |
| H | 4.990901  | 2.141681  | -0.189895 | C | 3.044055  | -3.389102 | -2.059824 | H  | -3.024510 | -2.832951 | -3.004391 |
| H | 6.175154  | -0.000119 | 0.139814  | H | 3.023758  | -2.832852 | -3.004240 | H  | -2.499950 | -4.329082 | -2.207282 |
| C | -2.465192 | 0.000127  | -0.907944 | H | 4.088952  | -3.640781 | -1.844524 | C  | -2.387366 | -3.389878 | 0.398126  |
| C | -3.113471 | 1.237216  | -0.723382 | H | 2.499471  | -4.329056 | -2.207089 | H  | -1.832502 | -4.324389 | 0.252759  |
| C | -3.113498 | -1.236998 | -0.723678 | C | 2.387587  | -3.390065 | 0.398406  | H  | -1.905610 | -2.825791 | 1.203398  |
| C | -4.461114 | 1.206435  | -0.344839 | H | 3.399933  | -3.652521 | 0.727045  | H  | -3.399635 | -3.652223 | 0.727087  |
| C | -4.461141 | -1.206278 | -0.345131 | H | 1.906101  | -2.826031 | 1.203876  | Au | -0.000019 | -0.000133 | 1.517572  |
| C | -5.129911 | 0.000064  | -0.157393 | H | 1.832621  | -4.324525 | 0.253111  | Cl | -0.000099 | -0.000367 | 3.842650  |
| H | -4.990743 | 2.141813  | -0.189656 | C | -2.411112 | 2.578253  | -0.911437 | N  | 1.079889  | 0.000124  | -1.326043 |
| H | -4.990790 | -2.141684 | -0.190181 | H | -1.370049 | 2.383480  | -1.187092 | N  | -1.079850 | 0.000166  | -1.326062 |
| H | -6.175140 | 0.000042  | 0.139716  | C | -2.411180 | -2.578013 | -0.912037 | C  | 0.000013  | 0.000052  | -0.491192 |
| C | 2.411300  | 2.578181  | -0.911739 |   |           |           |           |    |           |           |           |

### AuCl<sub>3</sub>(IPr)

|   |           |           |           |   |           |           |           |    |           |           |           |
|---|-----------|-----------|-----------|---|-----------|-----------|-----------|----|-----------|-----------|-----------|
| C | 0.676288  | -0.032413 | -2.676852 | H | 1.546429  | 2.390487  | -1.189370 | C  | -2.564123 | 3.236548  | -2.353896 |
| C | -0.676580 | 0.034421  | -2.676754 | C | 2.313678  | -2.686690 | -0.934076 | H  | -2.257962 | 2.524276  | -3.128668 |
| H | 1.388988  | -0.069739 | -3.484013 | H | 1.243889  | -2.486153 | -0.833621 | H  | -3.627297 | 3.457557  | -2.506309 |
| H | -1.389357 | 0.072437  | -3.483817 | C | 2.963464  | 2.792192  | -2.759804 | H  | -2.000678 | 4.164136  | -2.508754 |
| C | 2.489332  | -0.109616 | -0.961815 | H | 4.047090  | 2.868167  | -2.908741 | C  | -2.656353 | 3.754264  | 0.122723  |
| C | 3.070649  | -1.375886 | -0.735608 | H | 2.585945  | 2.034733  | -3.455622 | H  | -3.684329 | 4.121087  | 0.019778  |
| C | 3.224490  | 1.094897  | -0.912507 | H | 2.516747  | 3.754357  | -3.036392 | H  | -2.520785 | 3.369791  | 1.137155  |
| C | 4.428314  | -1.400993 | -0.392531 | C | 3.101807  | 3.592973  | -0.368029 | H  | -1.990499 | 4.615385  | 0.000318  |
| C | 4.578159  | 0.999849  | -0.566920 | C | 2.928280  | 3.351574  | 0.683453  | C  | -2.964528 | -2.789623 | -2.761675 |
| C | 5.172085  | -0.229204 | -0.298546 | H | 4.165234  | 3.821037  | -0.505474 | H  | -4.048189 | -2.865154 | -2.910608 |
| H | 4.908976  | -2.354358 | -0.201374 | H | 2.542705  | 4.505630  | -0.602836 | H  | -2.586813 | -2.031774 | -3.456964 |
| H | 5.174591  | 1.903993  | -0.508154 | C | 2.564797  | -3.234503 | -2.356404 | H  | -2.518126 | -3.751726 | -3.038983 |
| H | 6.222924  | -0.274866 | -0.025741 | C | 2.258373  | -2.521784 | -3.130662 | C  | -3.102999 | -3.592135 | -0.370512 |
| C | -2.489443 | 0.110696  | -0.961518 | H | 3.628020  | -3.455102 | -2.509067 | H  | -2.544163 | -4.504775 | -0.606015 |
| C | -3.070390 | 1.376965  | -0.734334 | H | 2.001606  | -4.162146 | -2.511851 | H  | -2.929387 | -3.351561 | 0.681146  |
| C | -3.224945 | -1.093638 | -0.913109 | C | 2.657435  | -3.753881 | 0.119850  | H  | -4.166496 | -3.819788 | -0.508099 |
| C | -4.428028 | 1.402202  | -0.391171 | H | 3.685542  | -4.120242 | 0.016580  | Au | 0.000085  | -0.000912 | 1.520837  |
| C | -4.578577 | -0.998461 | -0.567407 | H | 2.521797  | -3.370164 | 1.134558  | Cl | 0.348714  | 2.328705  | 1.525695  |
| C | -5.172128 | 0.230555  | -0.298040 | H | 1.991895  | -4.615167 | -0.003109 | Cl | 0.000195  | -0.002157 | 3.871312  |
| H | -4.908413 | 2.355558  | -0.199278 | C | -2.313048 | 2.687685  | -0.931963 | Cl | -0.348559 | -2.330541 | 1.523151  |
| H | -5.175270 | -1.902478 | -0.509320 | H | -1.243312 | 2.486756  | -0.831741 | N  | 1.085765  | -0.049276 | -1.348370 |
| H | -6.222943 | 0.276315  | -0.025156 | C | -2.634644 | -2.450538 | -1.291019 | N  | -1.085925 | 0.050288  | -1.348217 |
| C | 2.633771  | 2.451915  | -1.289376 | H | -1.547279 | -2.389487 | -1.191023 | C  | -0.000036 | 0.000100  | -0.534522 |

### Cl<sub>2</sub>

|    |     |     |          |    |     |     |           |  |  |  |  |
|----|-----|-----|----------|----|-----|-----|-----------|--|--|--|--|
| Cl | 0.0 | 0.0 | 1.021364 | Cl | 0.0 | 0.0 | -1.021364 |  |  |  |  |
|----|-----|-----|----------|----|-----|-----|-----------|--|--|--|--|

## References

- S1) K. Hata, Y. Segawa, K. Itami, *Chem. Commun.* **2012**, 48, 6642.
- S2) S. Gaillard, A. M. Z. Slawin, A. T. Bonura, E. D. Stevens, S. T. Nolan, *Organometallics* **2010**, 29, 394.
- S3) K. Funaki, T. Sato, S. Oi, *Org. Lett.* **2012**, 14, 6186.
- S4) A. Altomare, M. C. Burla, M. Camalli, G. L. Casciarano, C. Giacovazza, A. Guagliardi, A. G. G. Moliterni, G. Polidori, R. Spagna, *J. Appl. Crystallogr.* **1999**, 32, 115.
- S5) G. M. Sheldrick, University of Göttingen: Göttingen, Germany **1997**.
- S6) M. J. Frisch, G. W. Trucks, H. B. Schlegel, G. E. Scuseria, M. A. Robb, J. R. Cheeseman, G. Scalmani, V. Barone, B. Mennucci, G. A. Petersson, H. Nakatsuji, M. Caricato, X. Li, H. P. Hratchian, A. F. Izmaylov, J. Bloino, G. Zheng, J. L. Sonnenberg, M. Hada, M. Ehara, K. Toyota, R. Fukuda, J. Hasegawa, M. Ishida, T. Nakajima, Y. Honda, O. Kitao, H. Nakai, T. Vreven, J. A. Montgomery, Jr., J. E. Peralta, F. Ogliaro, M. Bearpark, J. J. Heyd, E. Brothers, K. N. Kudin, V. N. Staroverov, R. Kobayashi, J. Normand, K. Raghavachari, A. Rendell, J. C. Burant, S. S. Iyengar, J. Tomasi, M. Cossi, N. Rega, J. M. Millam, M. Klene, J. E. Knox, J. B. Cross, V. Bakken, C. Adamo, J. Jaramillo, R. Gomperts, R. E. Stratmann, O. Yazyev, A. J. Austin, R. Cammi, C. Pomelli, J. W. Ochterski, R. L. Martin, K. Morokuma, V. G. Zakrzewski, G. A. Voth, P. Salvador, J. J. Dannenberg, S. Dapprich, A. D. Daniels, O. Farkas, J. B. Foresman, J. V. Ortiz, J. Cioslowski, D. J. Fox, Gaussian 09, Revision D.01, Gaussian, Inc., Wallingford CT, **2013**.
- S7) P. Fuentealba, H. Preuss, H. Stoll, L. Von Szentpály, *Chem. Phys. Lett.* **1982**, 89, 418.



# <sup>1</sup>H and <sup>13</sup>C NMR spectra

<sup>1</sup>H NMR spectrum of AuCl<sub>3</sub>(PyC) (600 MHz, CDCl<sub>3</sub>)

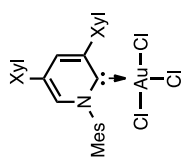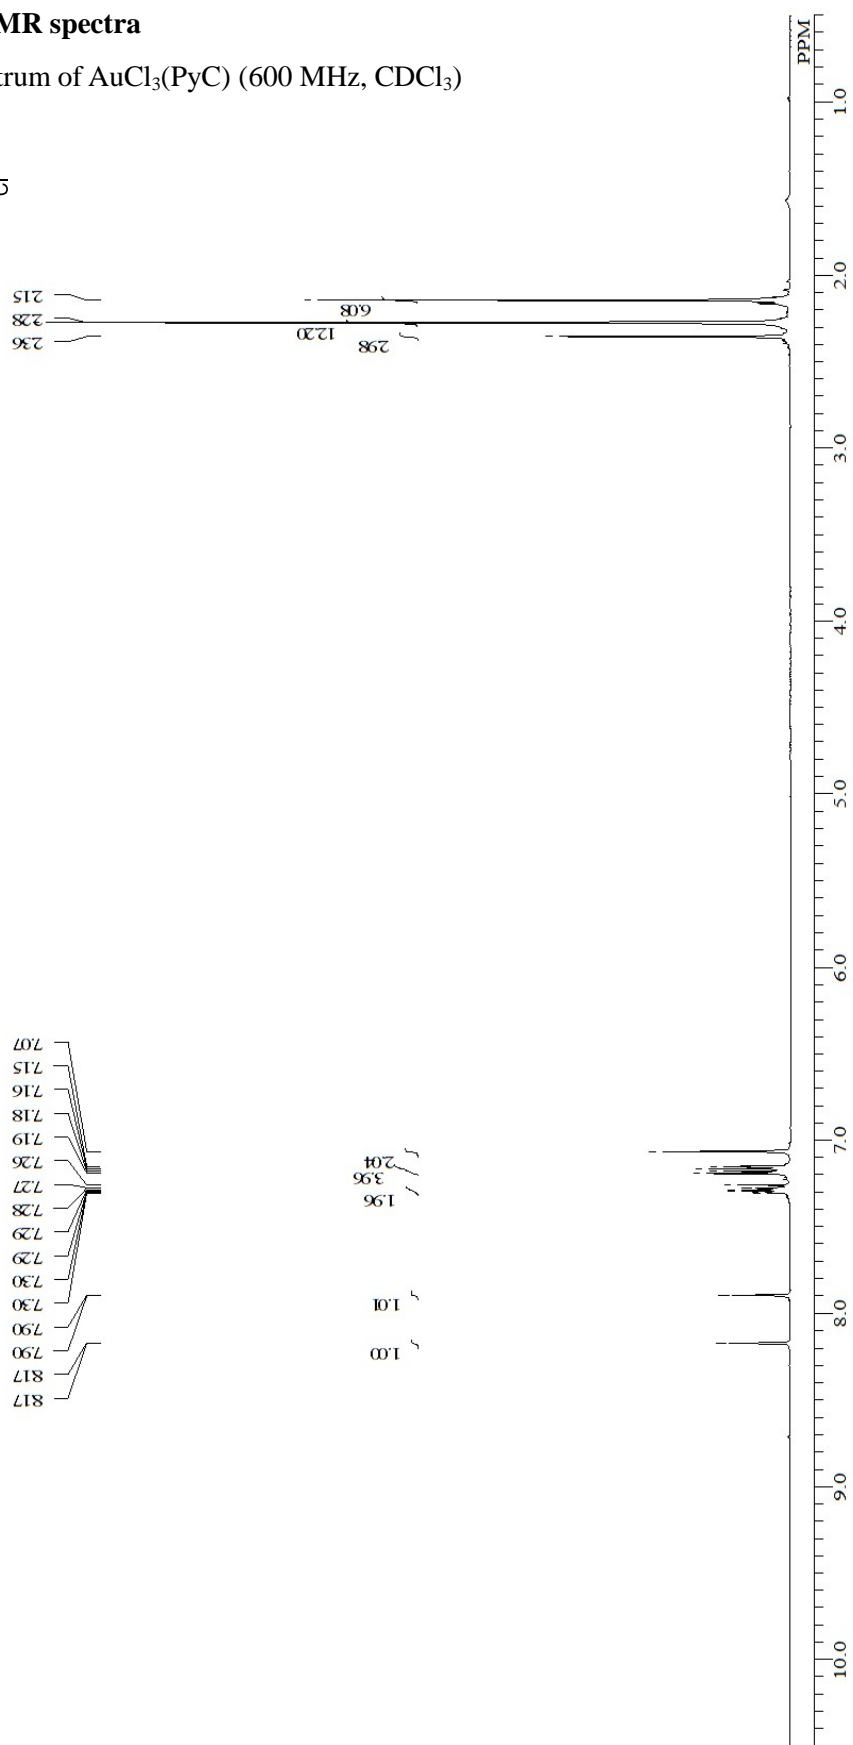

$^{13}\text{C}$  NMR spectrum of  $\text{AuCl}_3(\text{PyC})$  (150 MHz,  $\text{CDCl}_3$ )

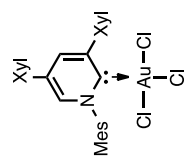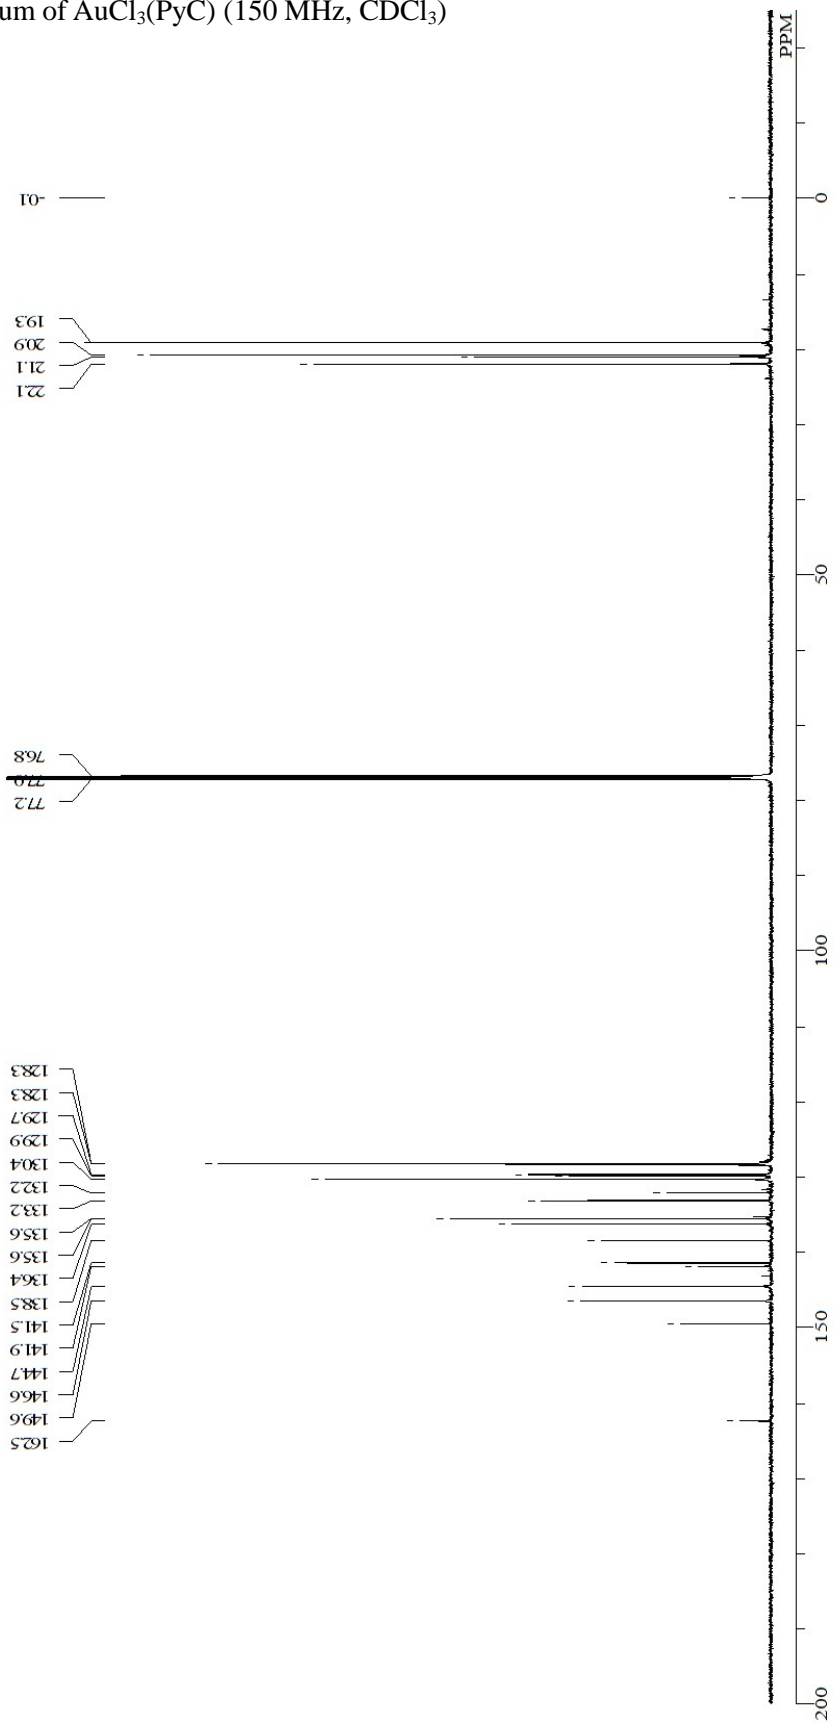

$^1\text{H}$  NMR spectrum of **3aa** (600 MHz,  $\text{CDCl}_3$ )

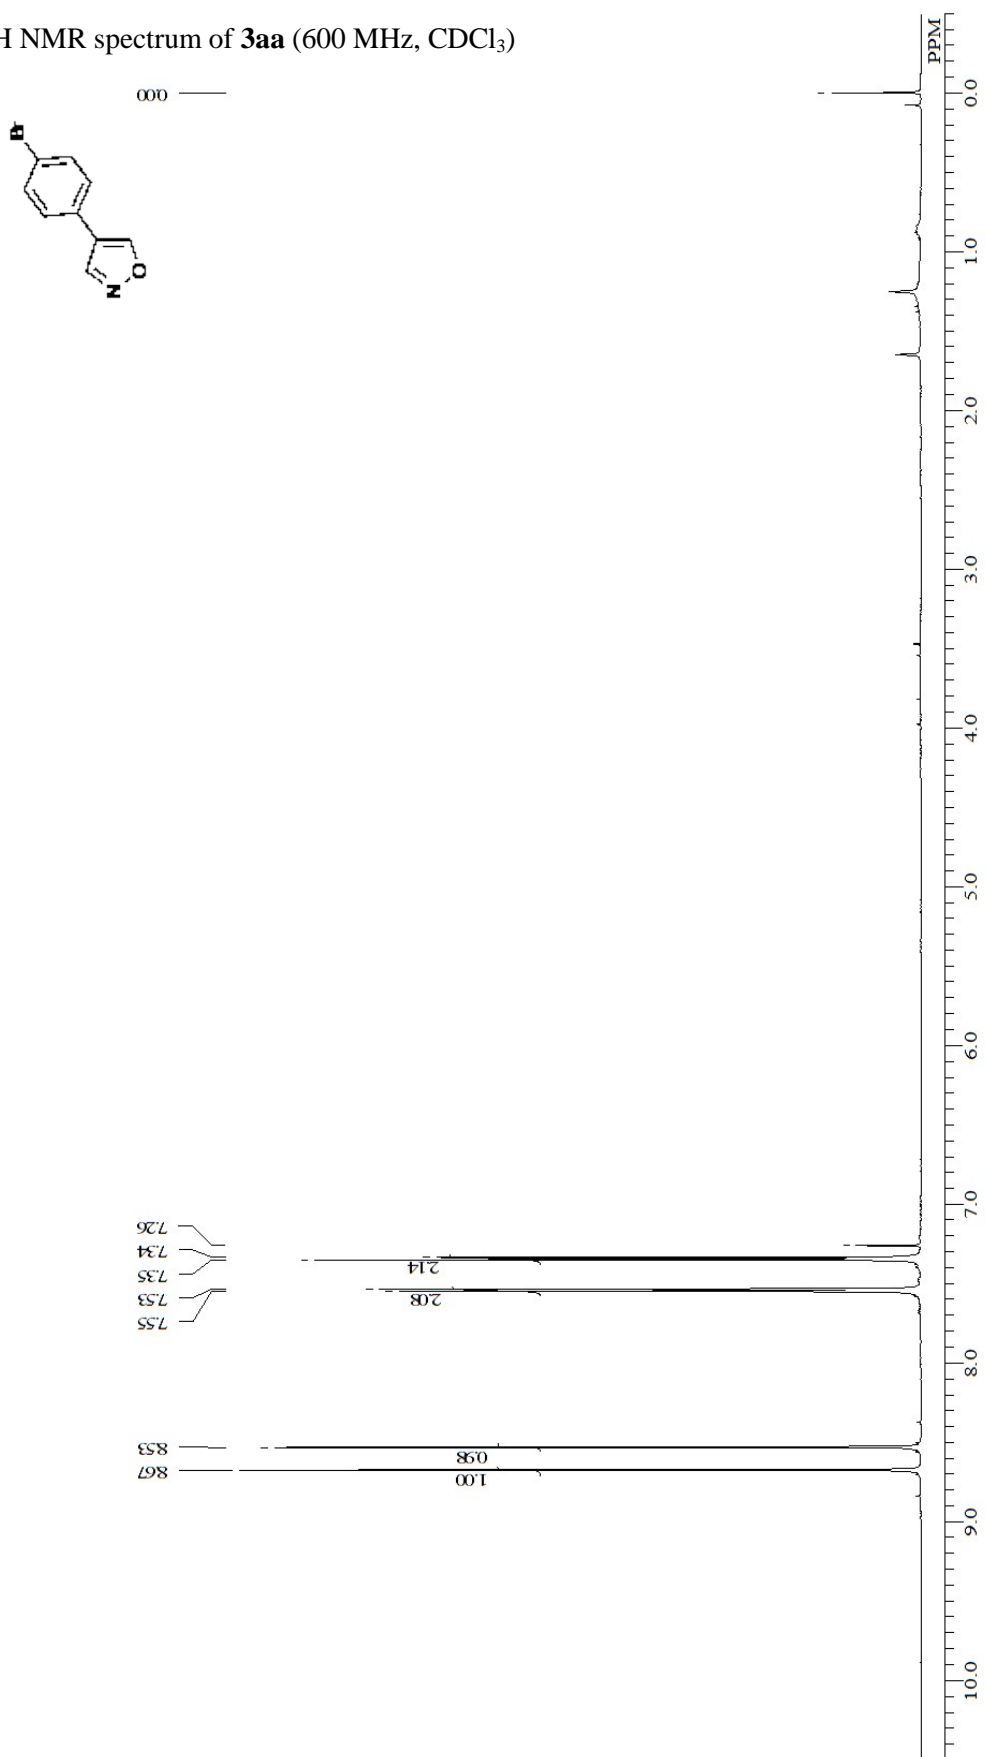

$^{13}\text{C}$  NMR spectrum of **3aa** (150 MHz,  $\text{CDCl}_3$ )

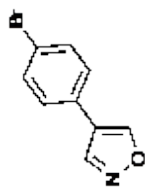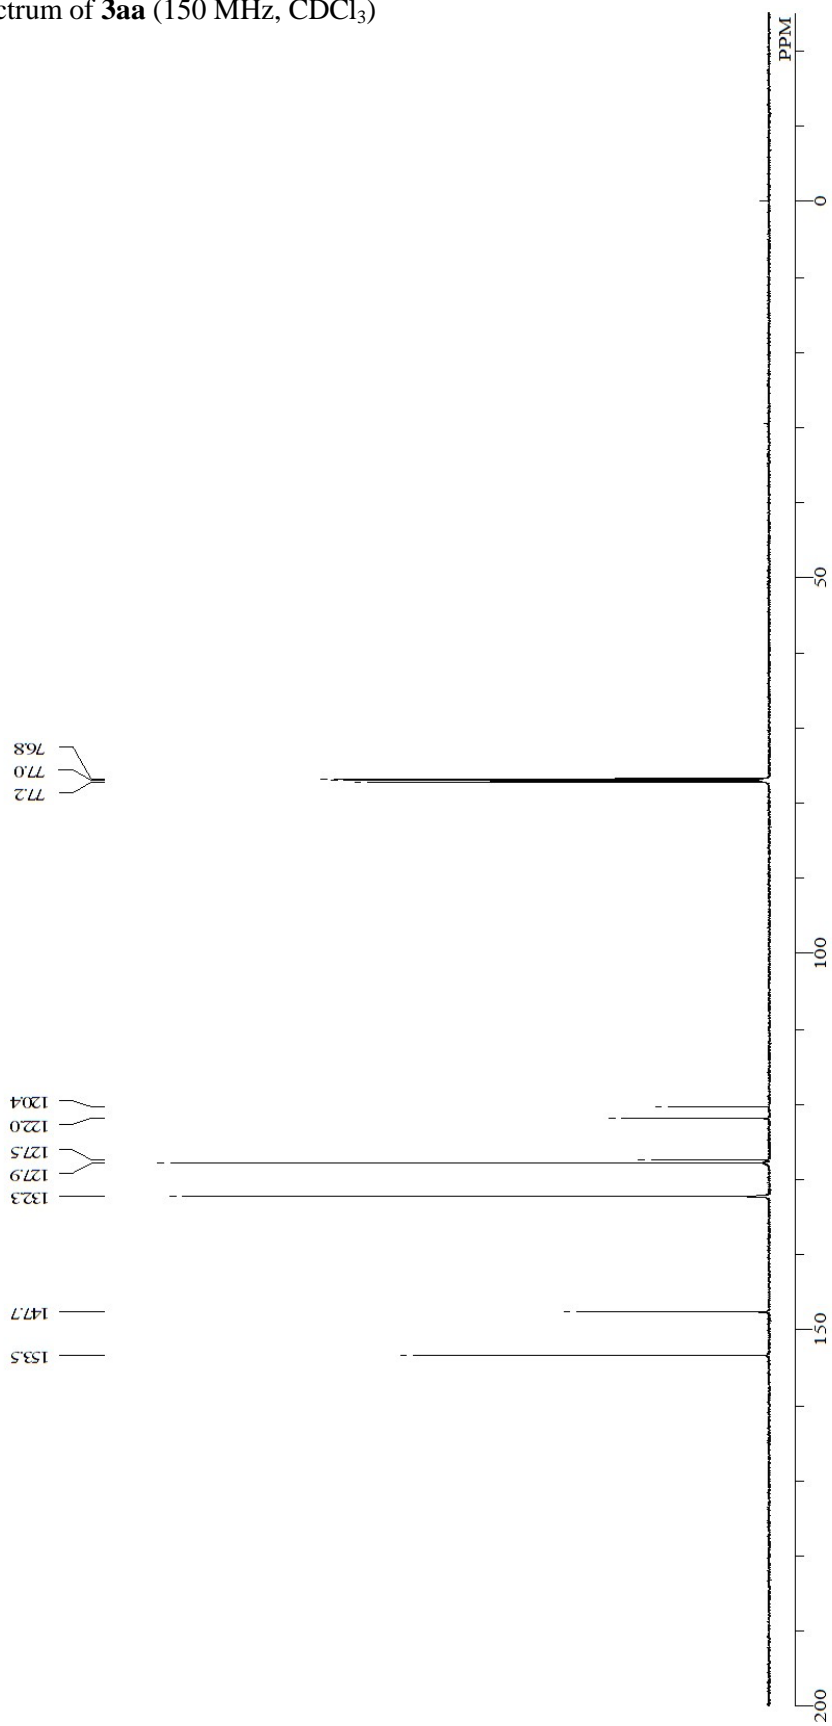

$^1\text{H}$  NMR spectrum of **3ab** (600 MHz,  $\text{CDCl}_3$ )

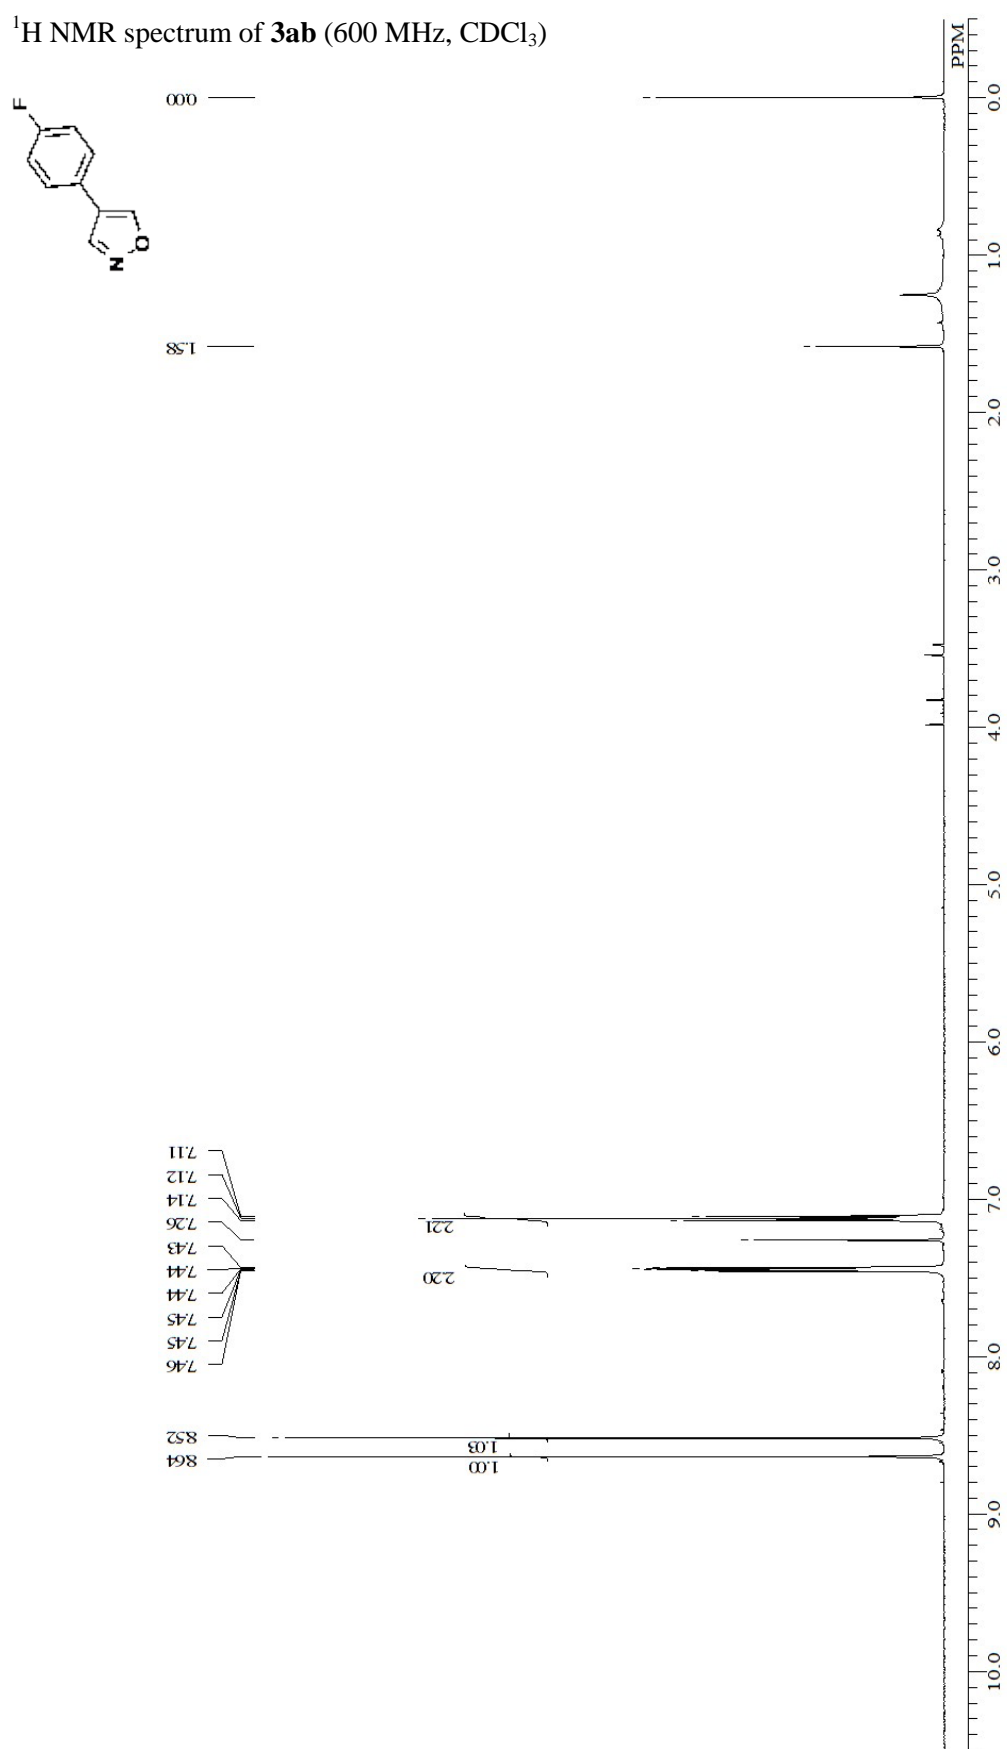

$^{13}\text{C}$  NMR spectrum of **3ab** (150 MHz,  $\text{CDCl}_3$ )

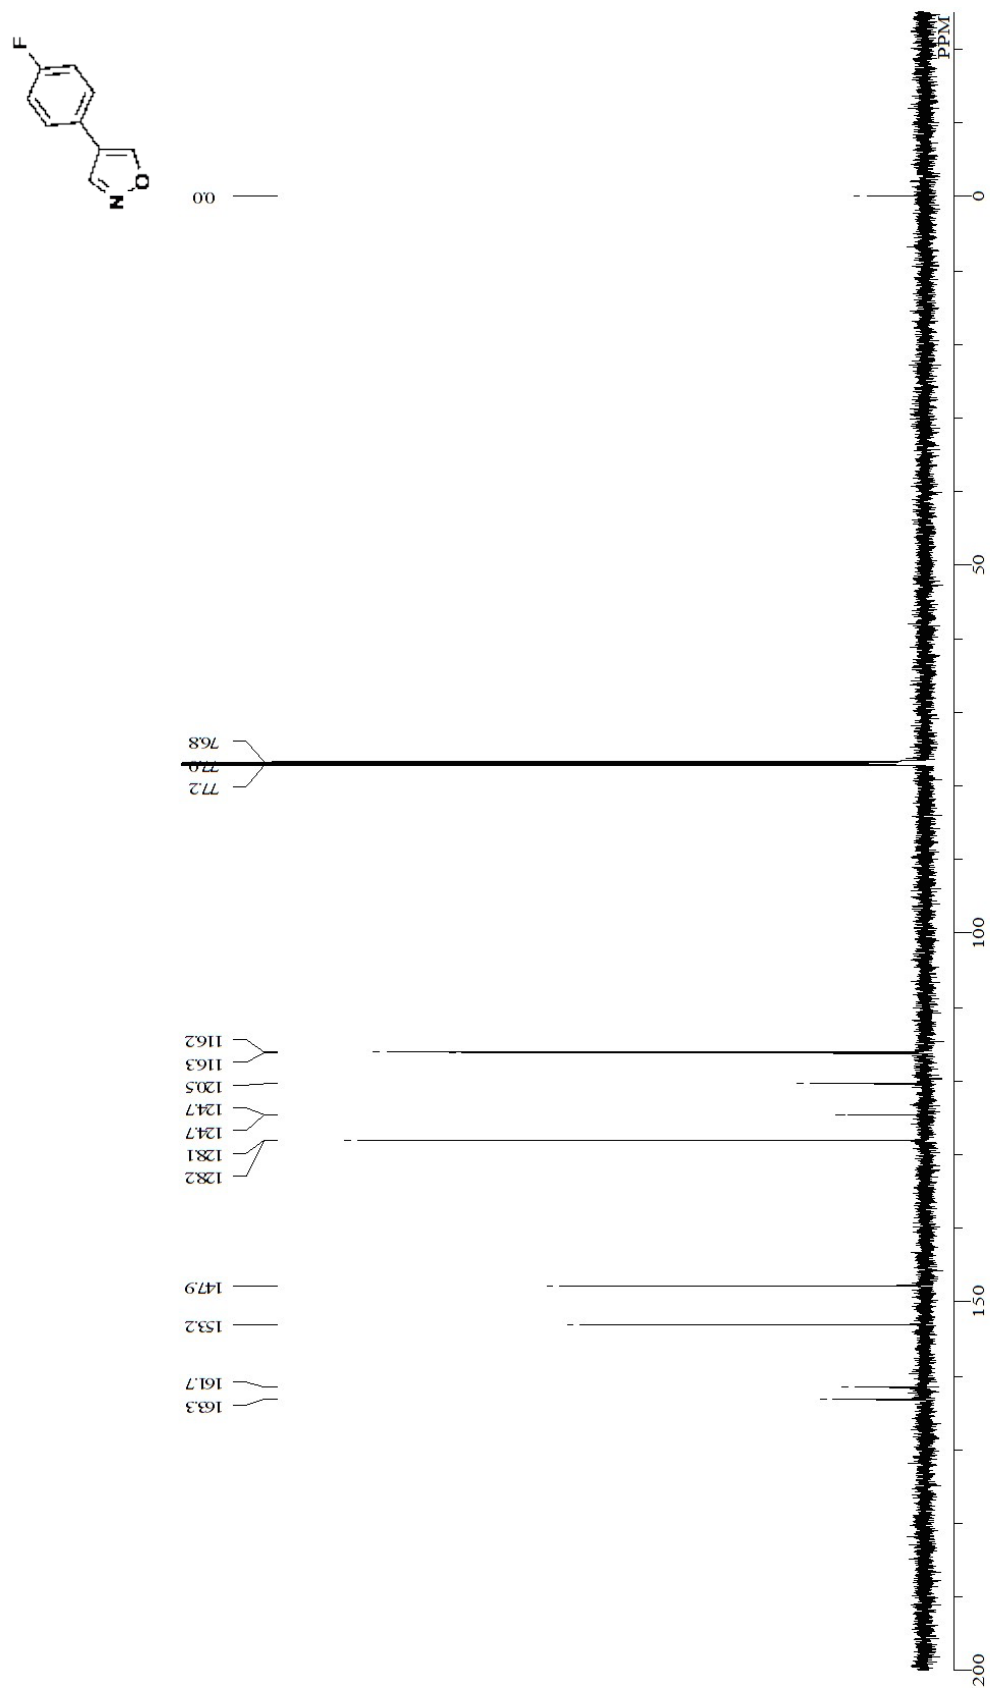

<sup>1</sup>H NMR spectrum of **3ba** (600 MHz, CDCl<sub>3</sub>)

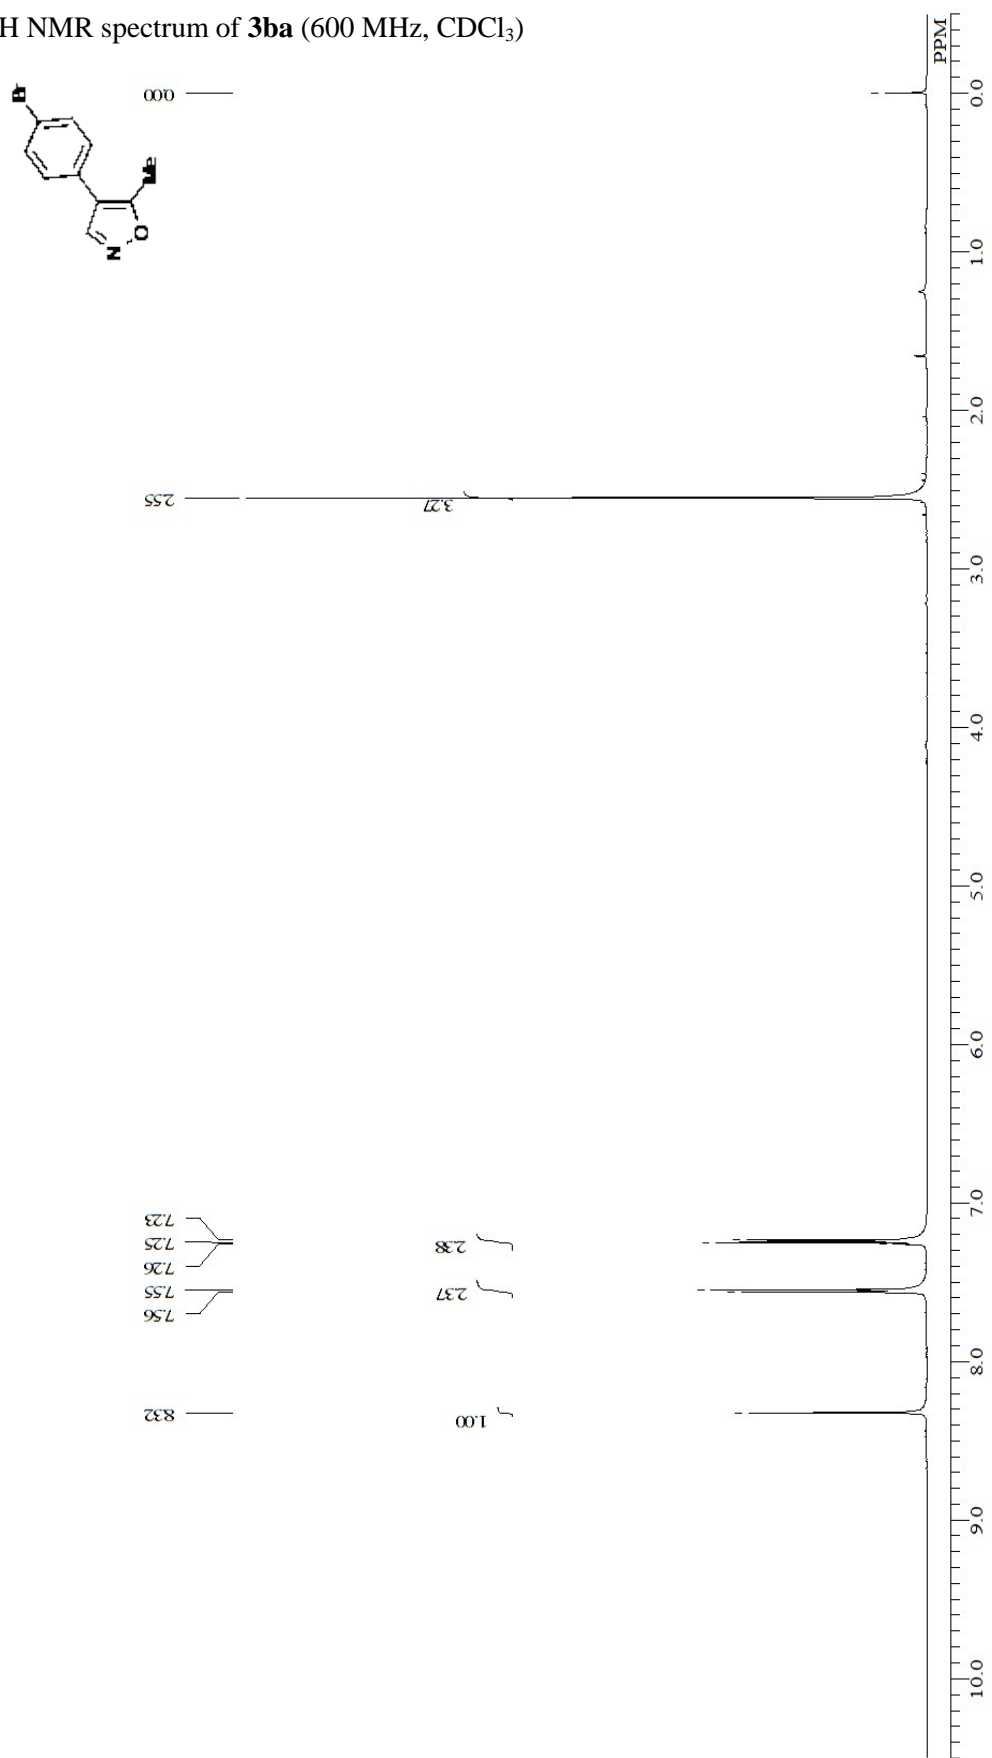

$^{13}\text{C}$  NMR spectrum of **3ba** (150 MHz,  $\text{CDCl}_3$ )

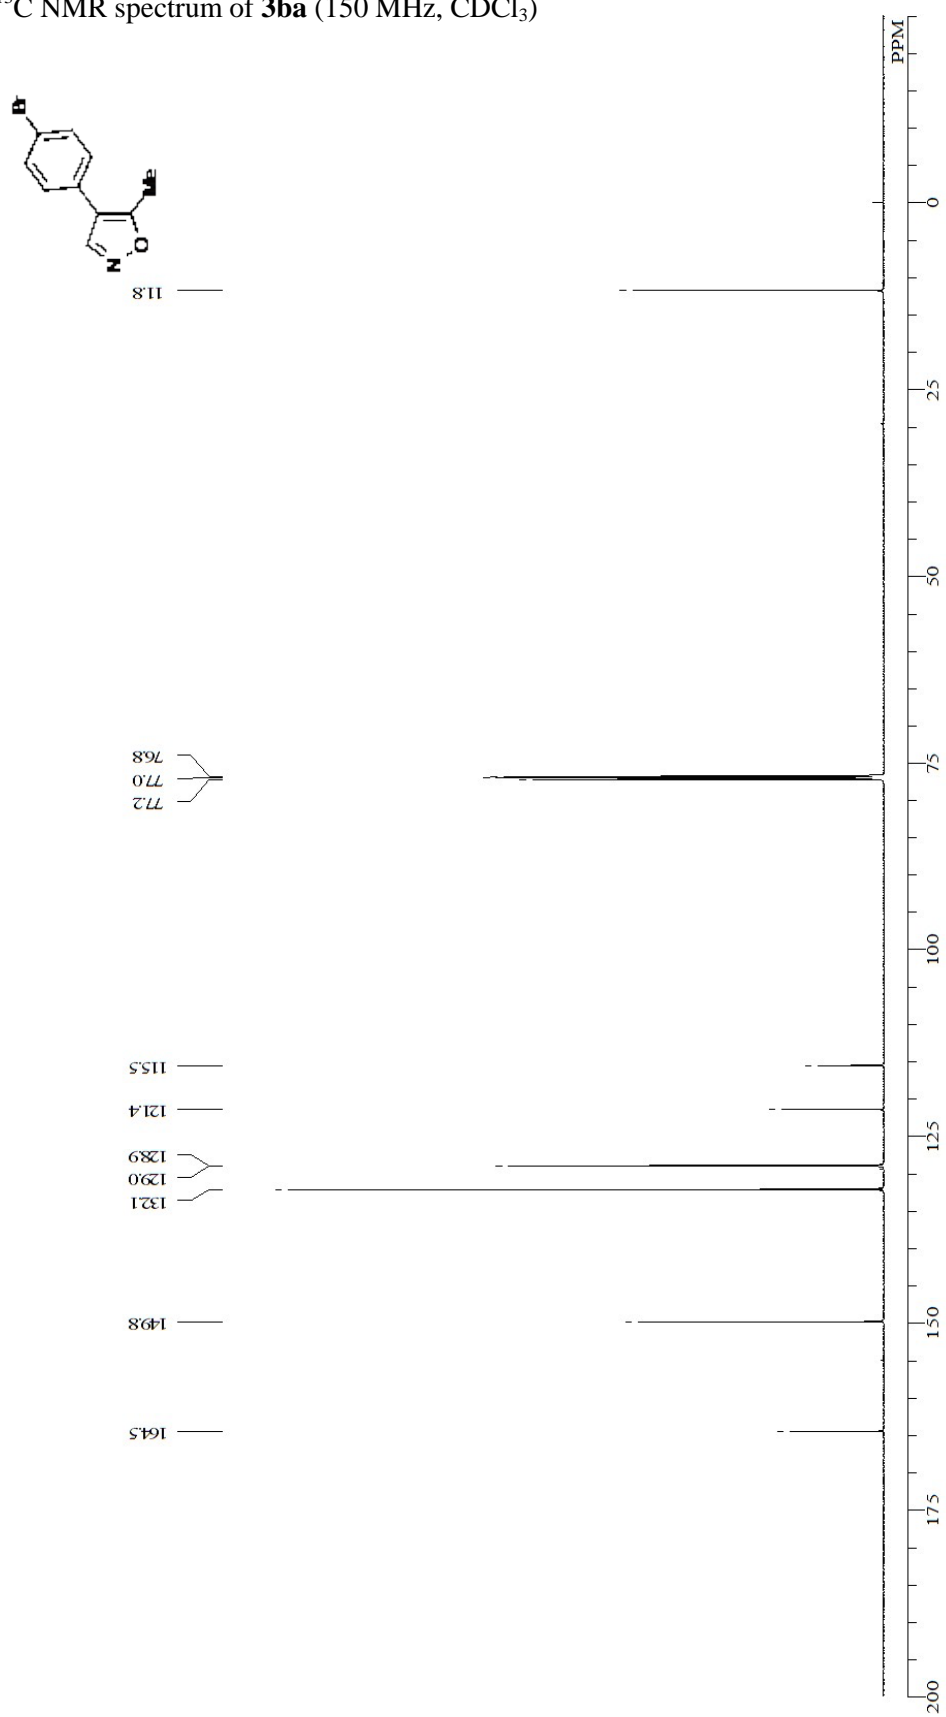



$^1\text{H}$  NMR spectrum of **3bb** (600 MHz,  $\text{CDCl}_3$ )

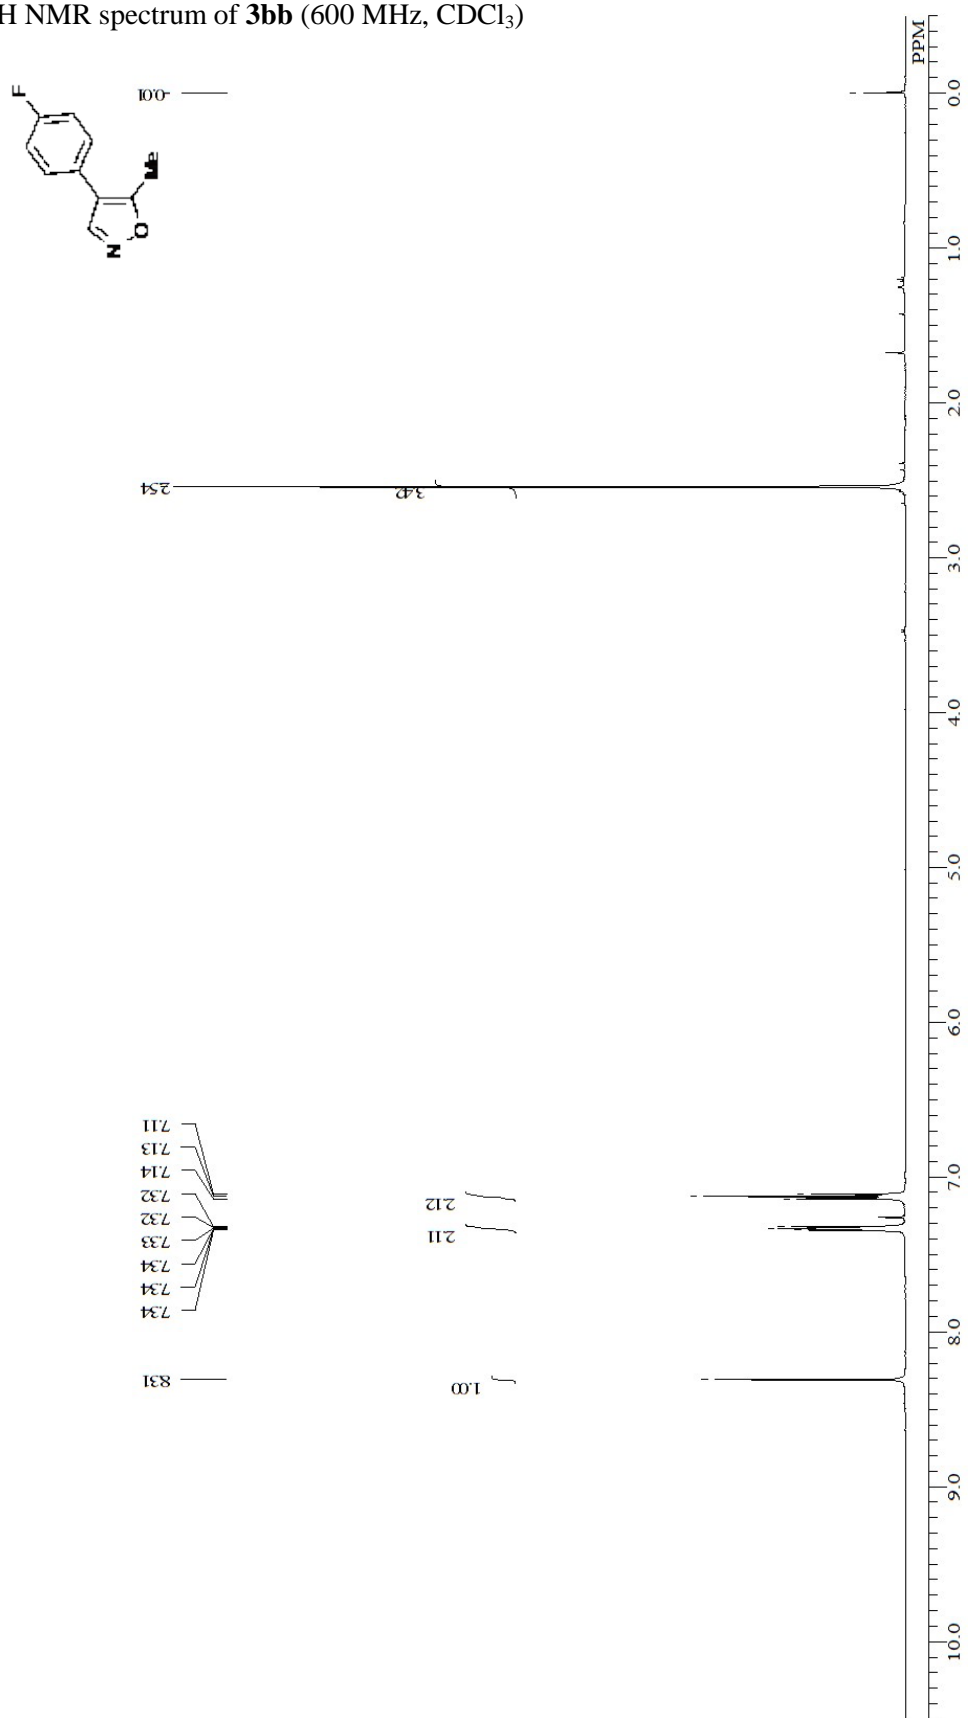

$^{13}\text{C}$  NMR spectrum of **3bb** (150 MHz,  $\text{CDCl}_3$ )

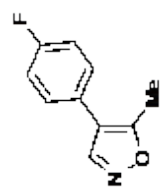

11.6

77.2  
77.0  
76.8

129.2  
129.1  
126.1  
126.1  
116.0  
115.9  
115.6

150.0

164.2  
162.9  
161.3

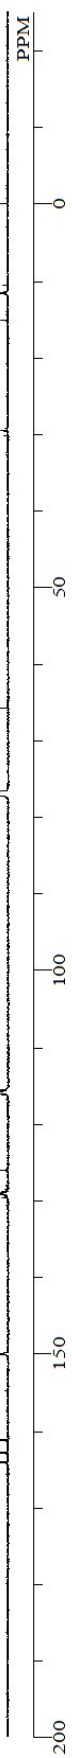

<sup>1</sup>H NMR spectrum of **3bc** (600 MHz, CDCl<sub>3</sub>)

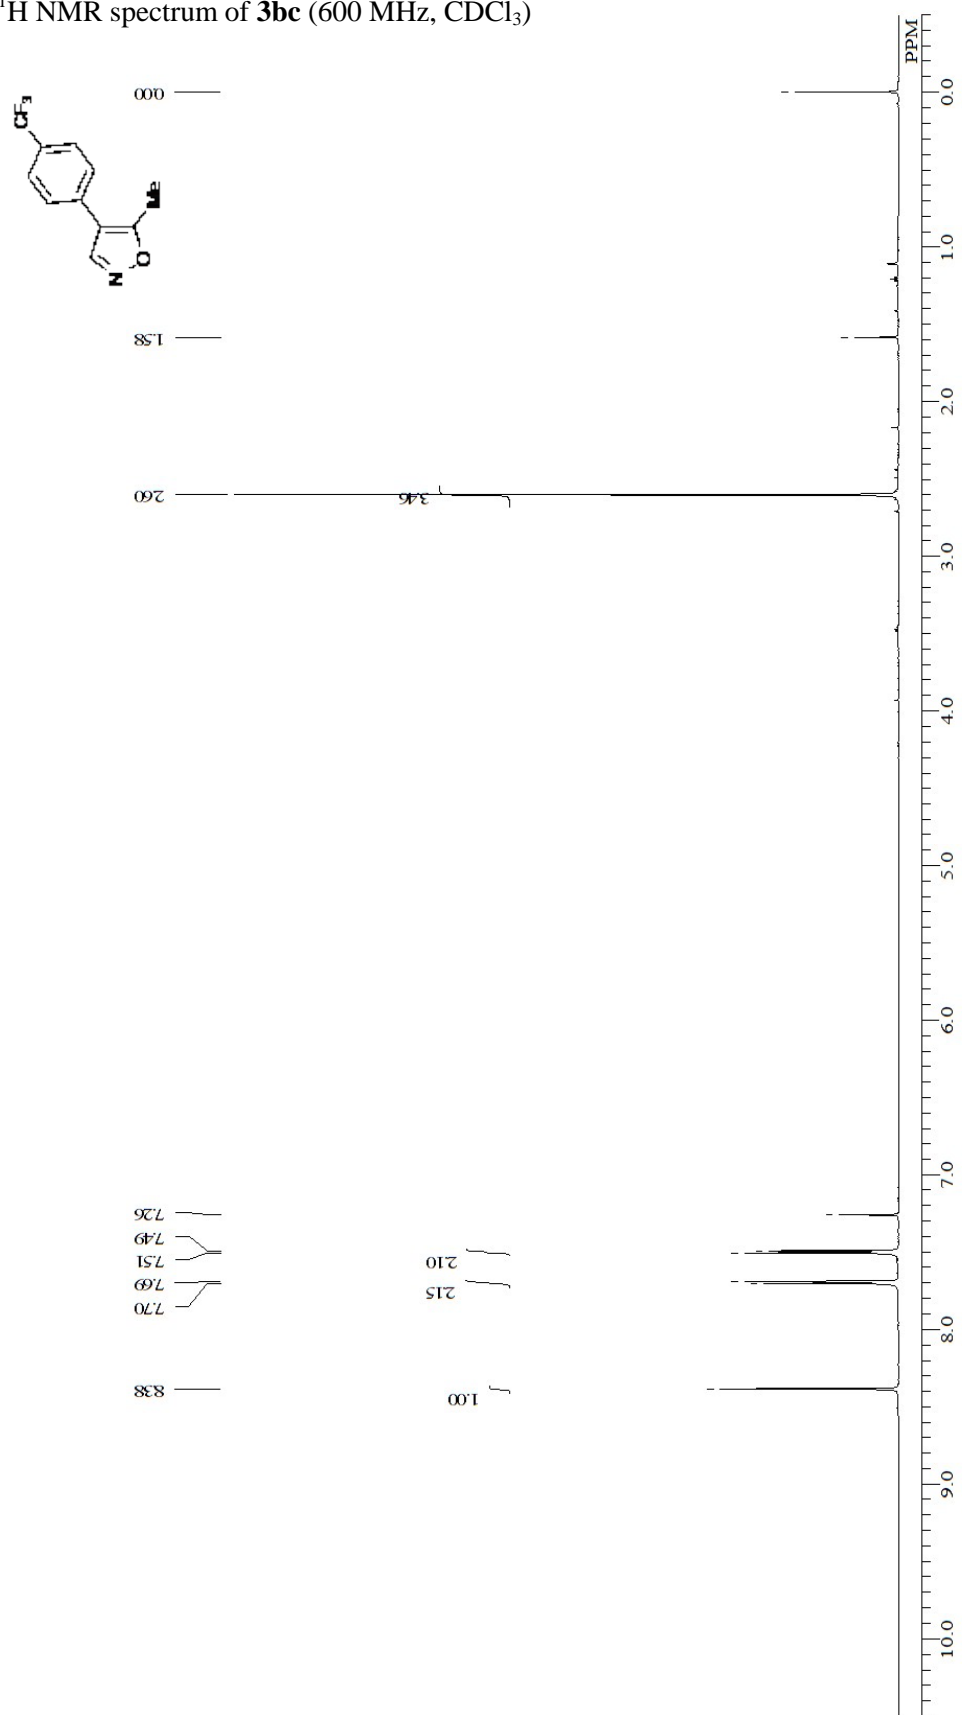

$^{13}\text{C}$  NMR spectrum of **3bc** (150 MHz,  $\text{CDCl}_3$ )

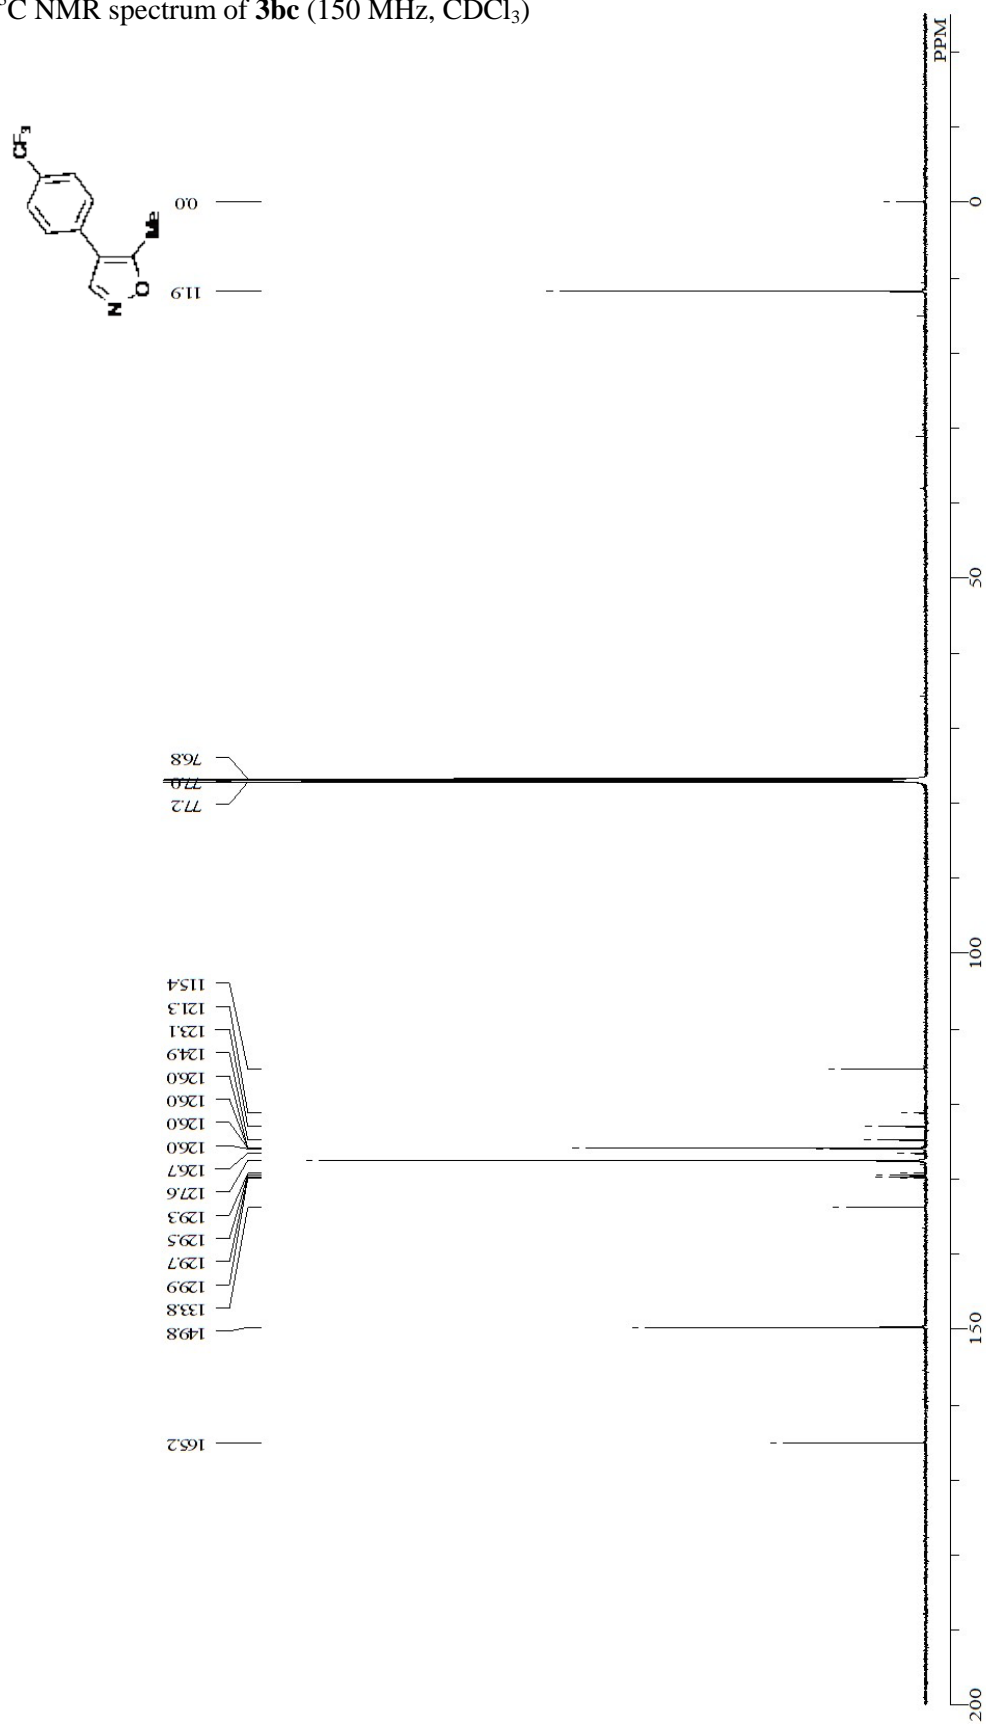

$^1\text{H}$  NMR spectrum of **3bd** (600 MHz,  $\text{CDCl}_3$ )

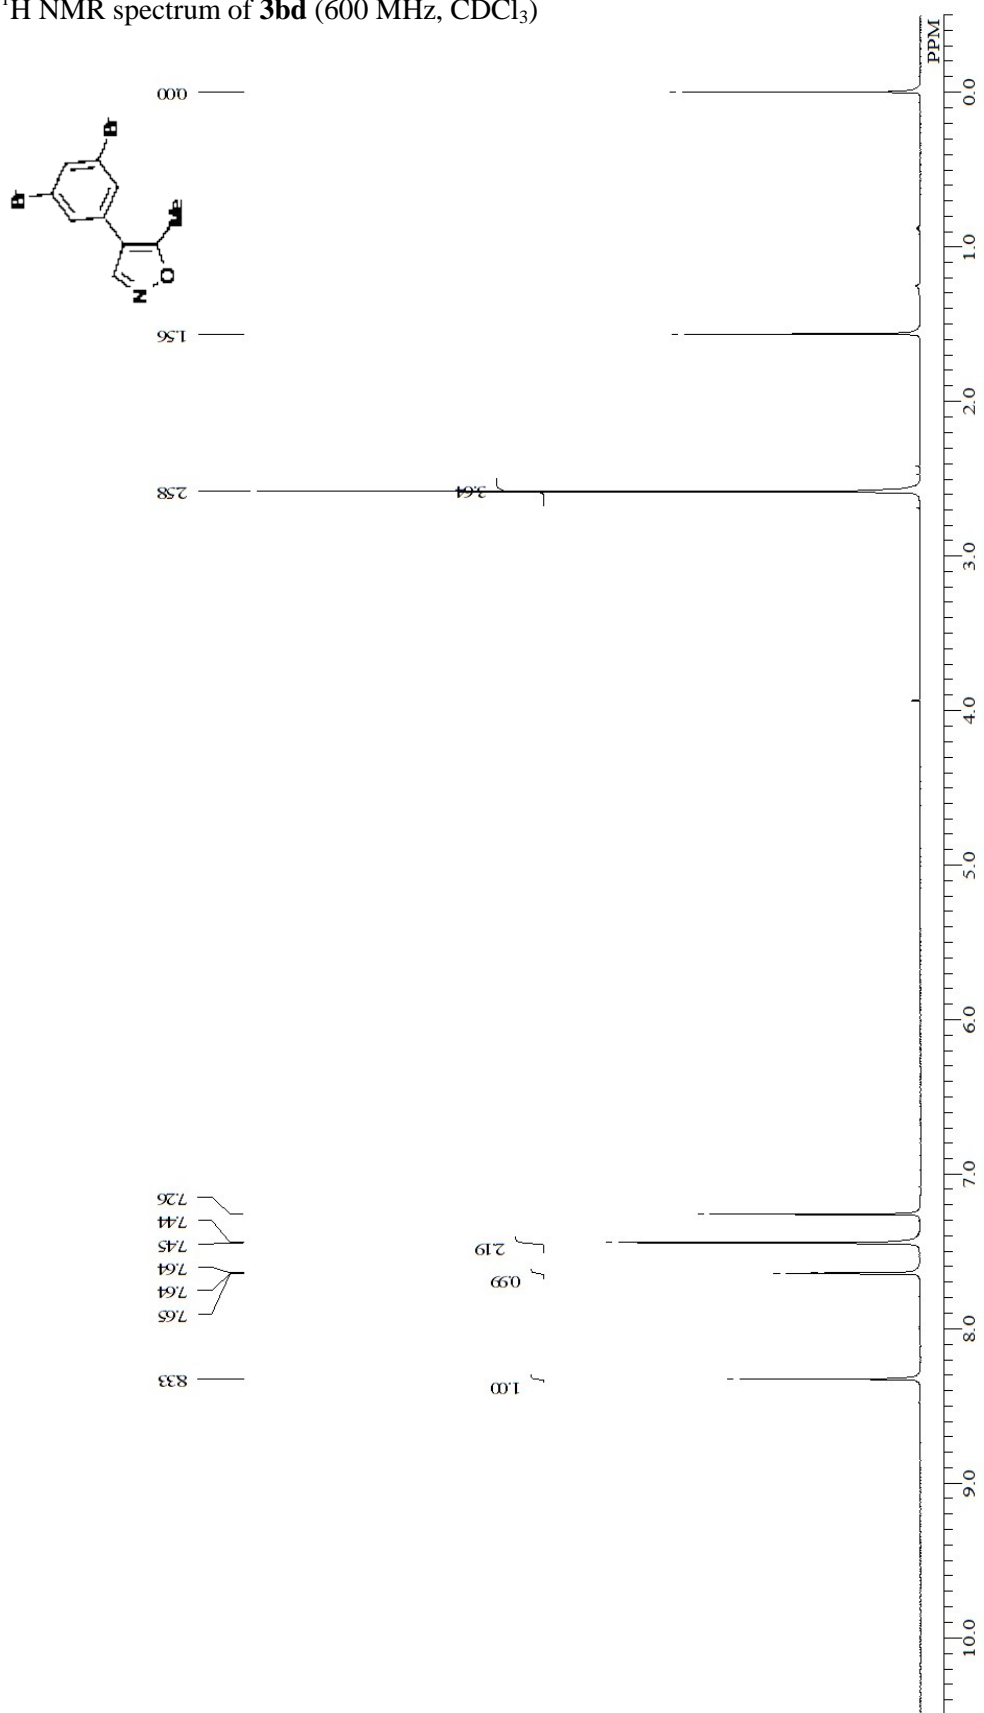

$^{13}\text{C}$  NMR spectrum of **3bd** (150 MHz,  $\text{CDCl}_3$ )

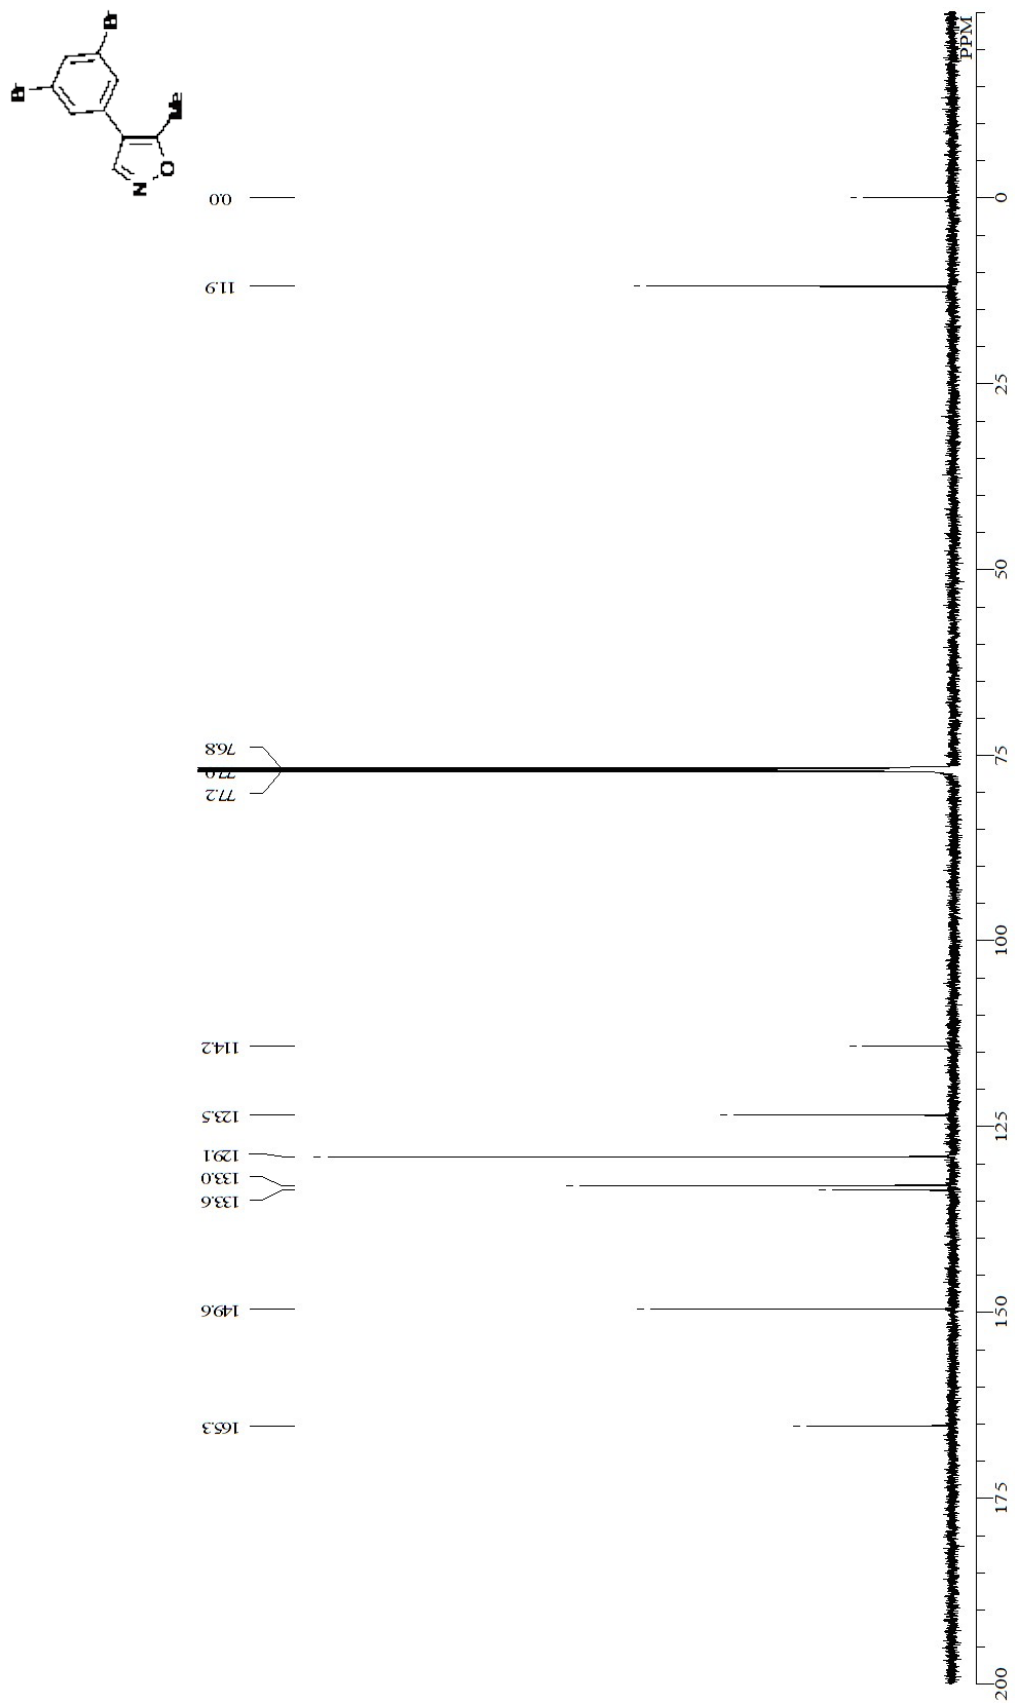

$^1\text{H}$  NMR spectrum of **3ca** (600 MHz,  $\text{CDCl}_3$ )

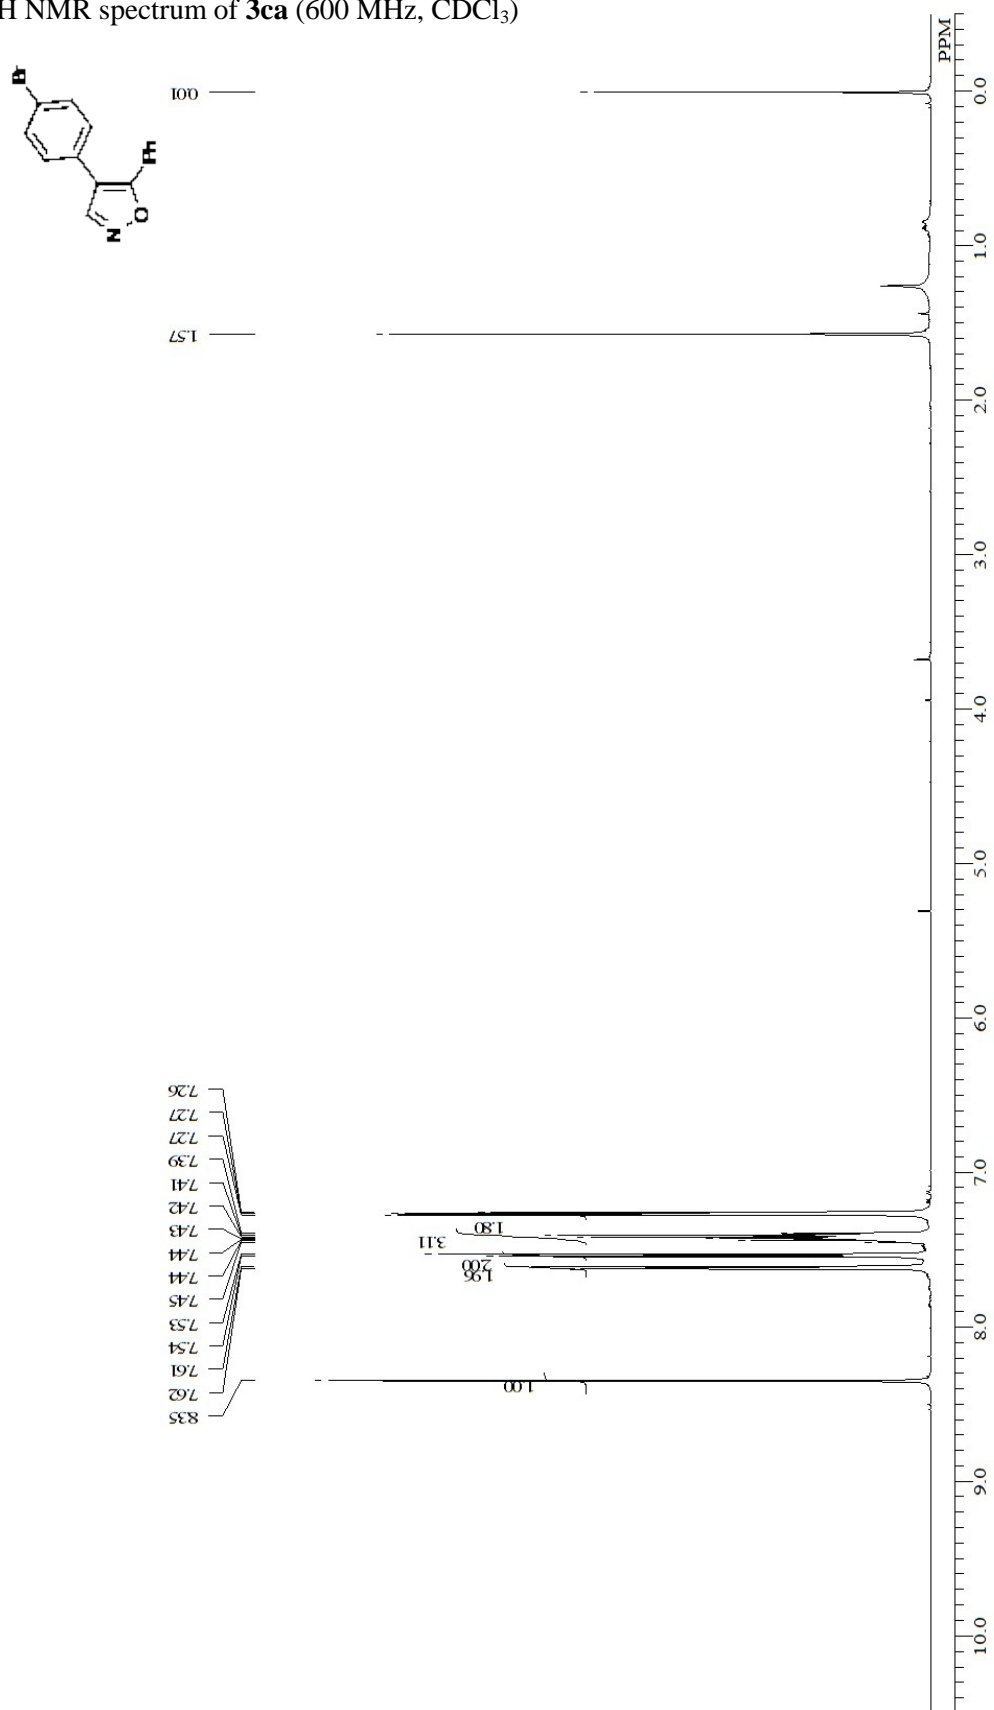

$^{13}\text{C}$  NMR spectrum of **3ca** (150 MHz,  $\text{CDCl}_3$ )

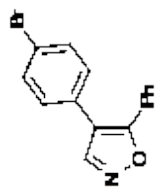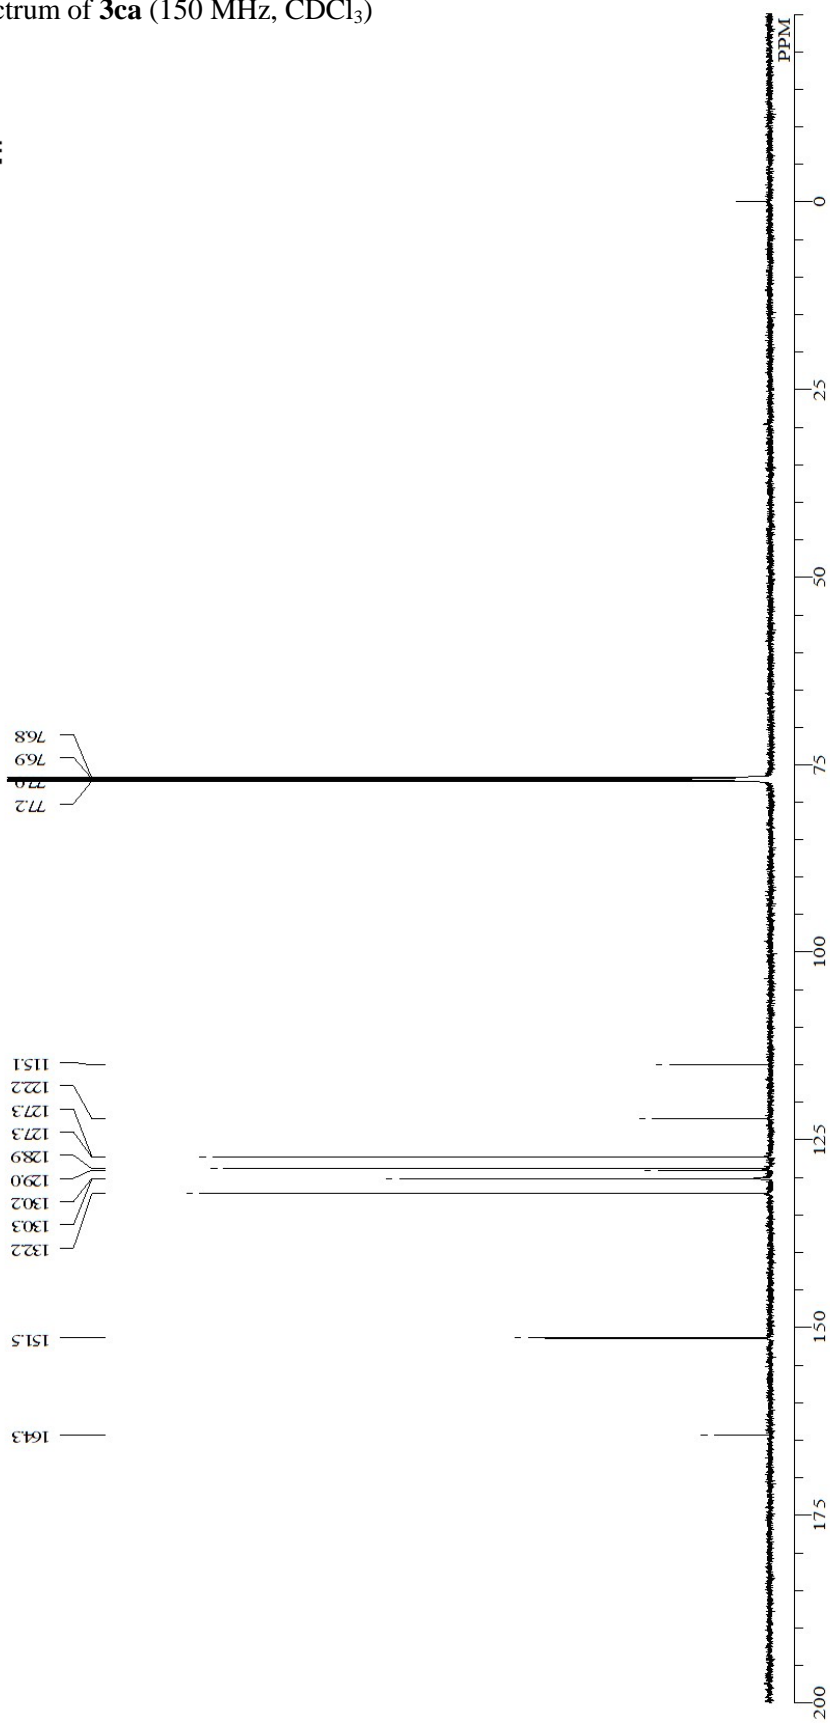



<sup>1</sup>H NMR spectrum of **3da** (600 MHz, CDCl<sub>3</sub>)

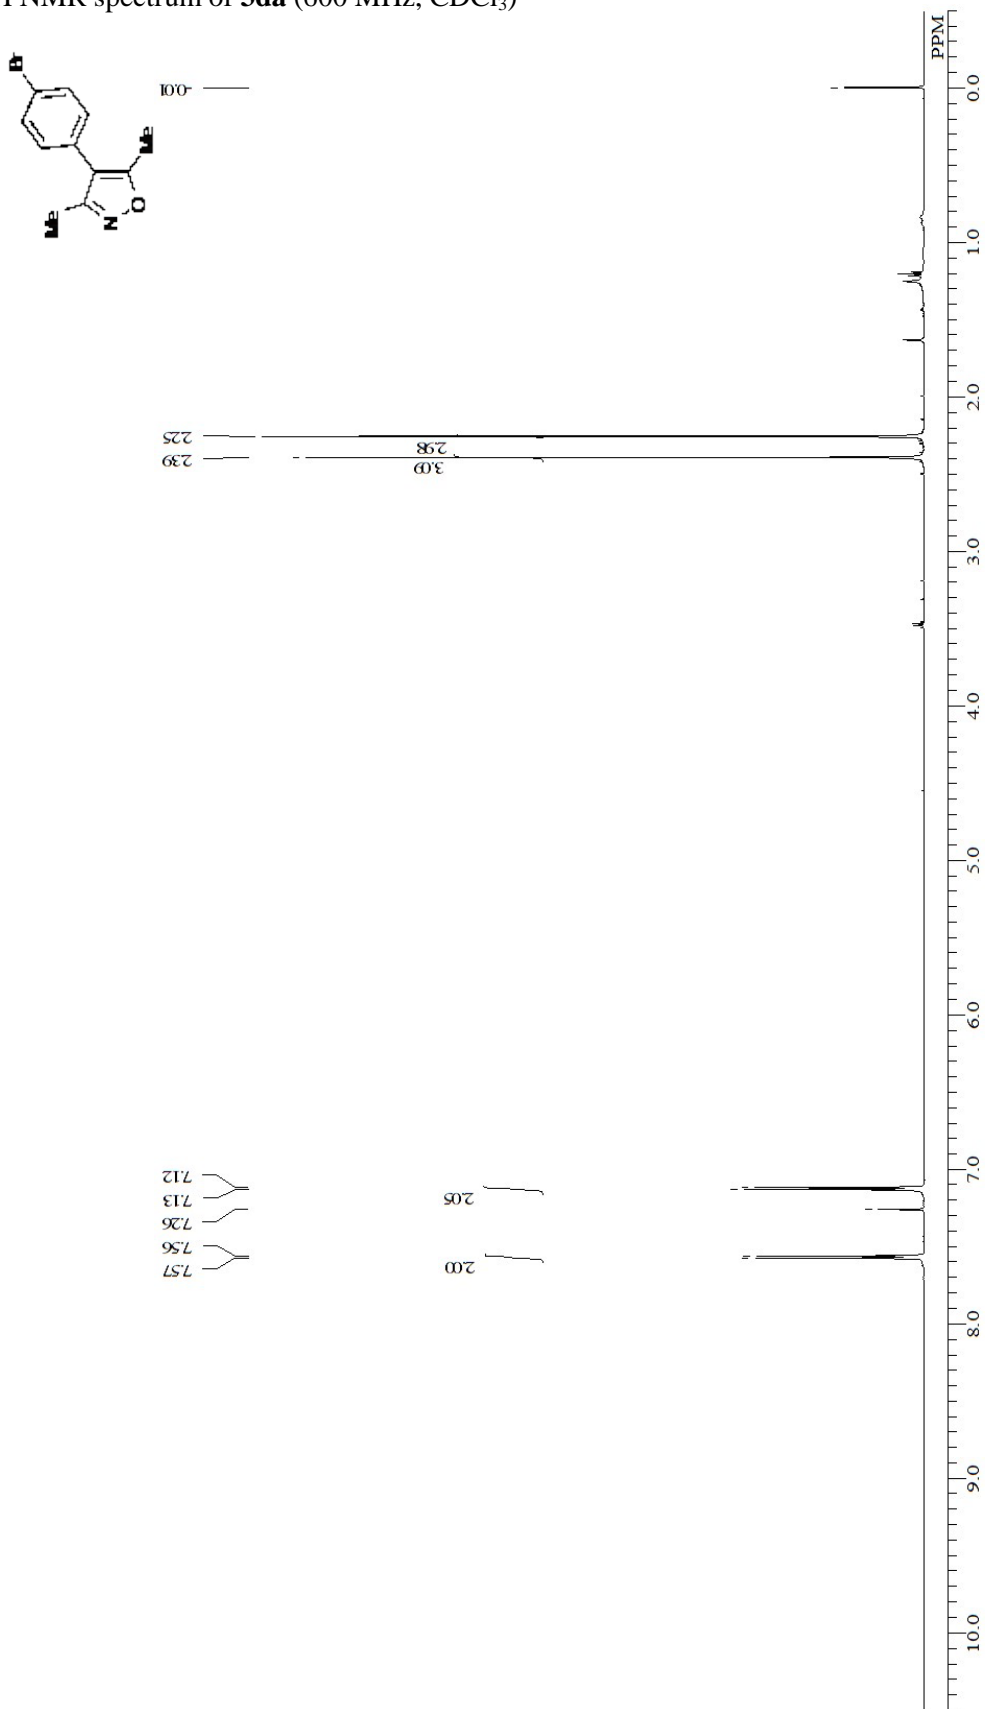

$^{13}\text{C}$  NMR spectrum of **3da** (150 MHz,  $\text{CDCl}_3$ )

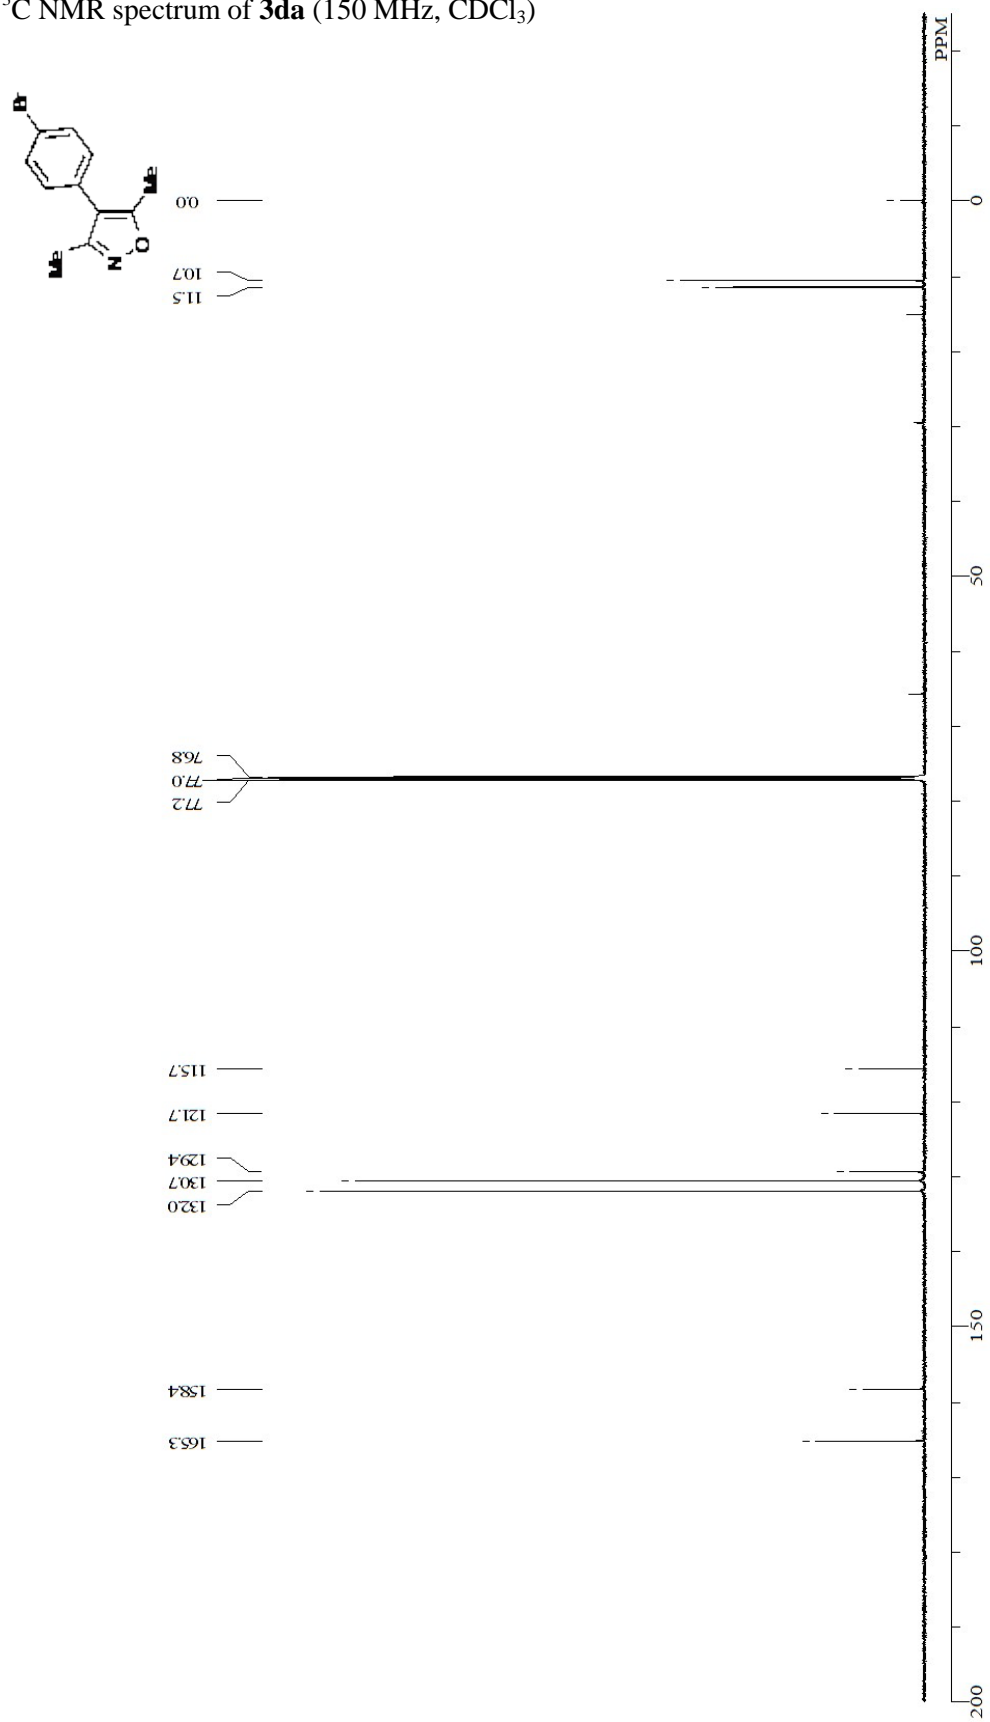



$^{13}\text{C}$  NMR spectrum of **3ea** (150 MHz,  $\text{CDCl}_3$ )

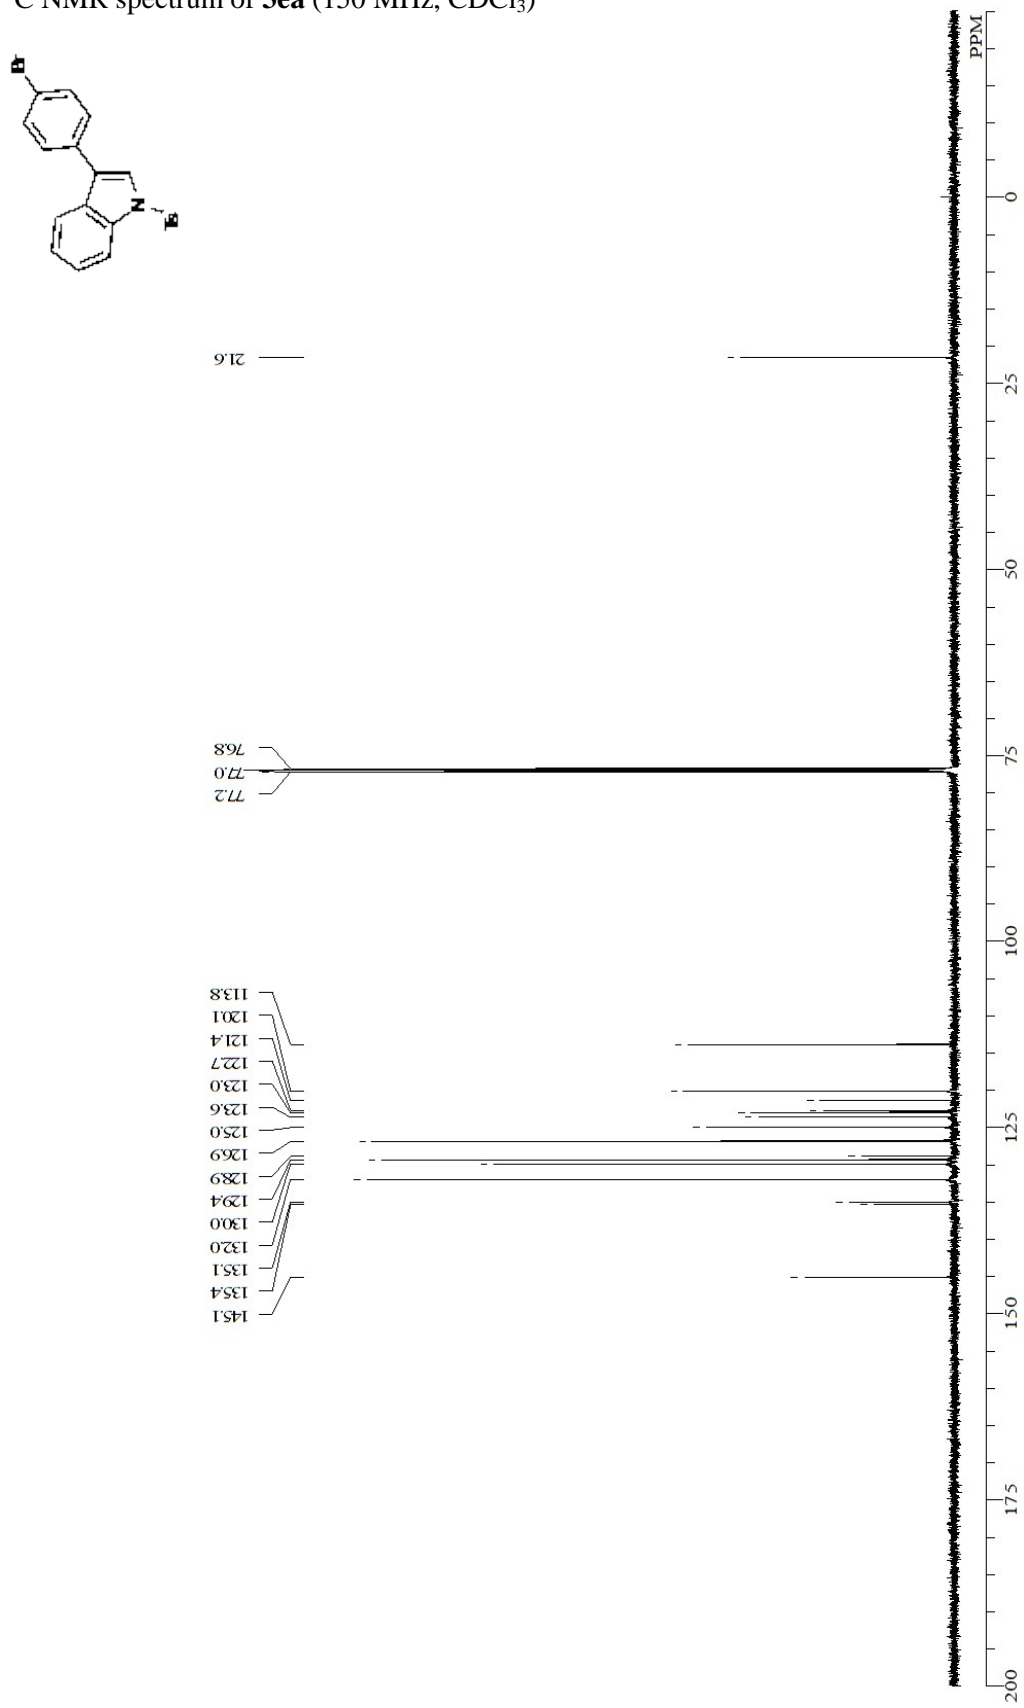

$^1\text{H}$  NMR spectrum of **3fa** (600 MHz,  $\text{CDCl}_3$ )

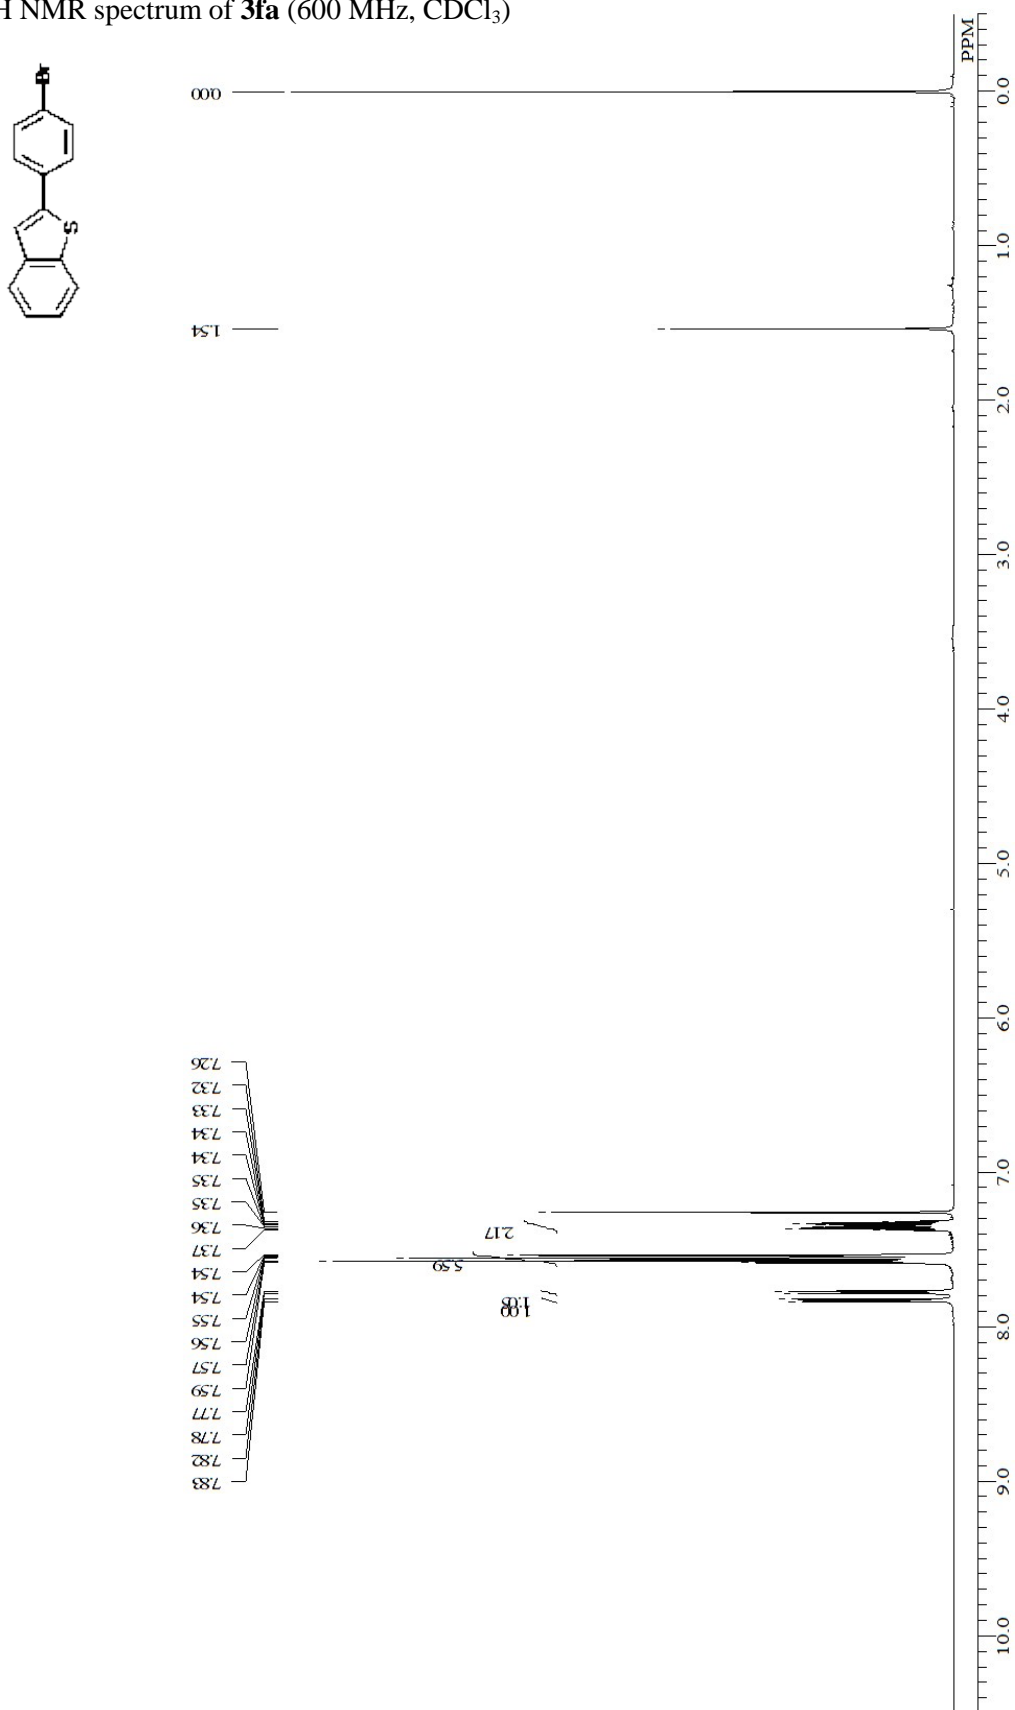

$^{13}\text{C}$  NMR spectrum of **3fa** (150 MHz,  $\text{CDCl}_3$ )

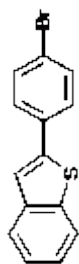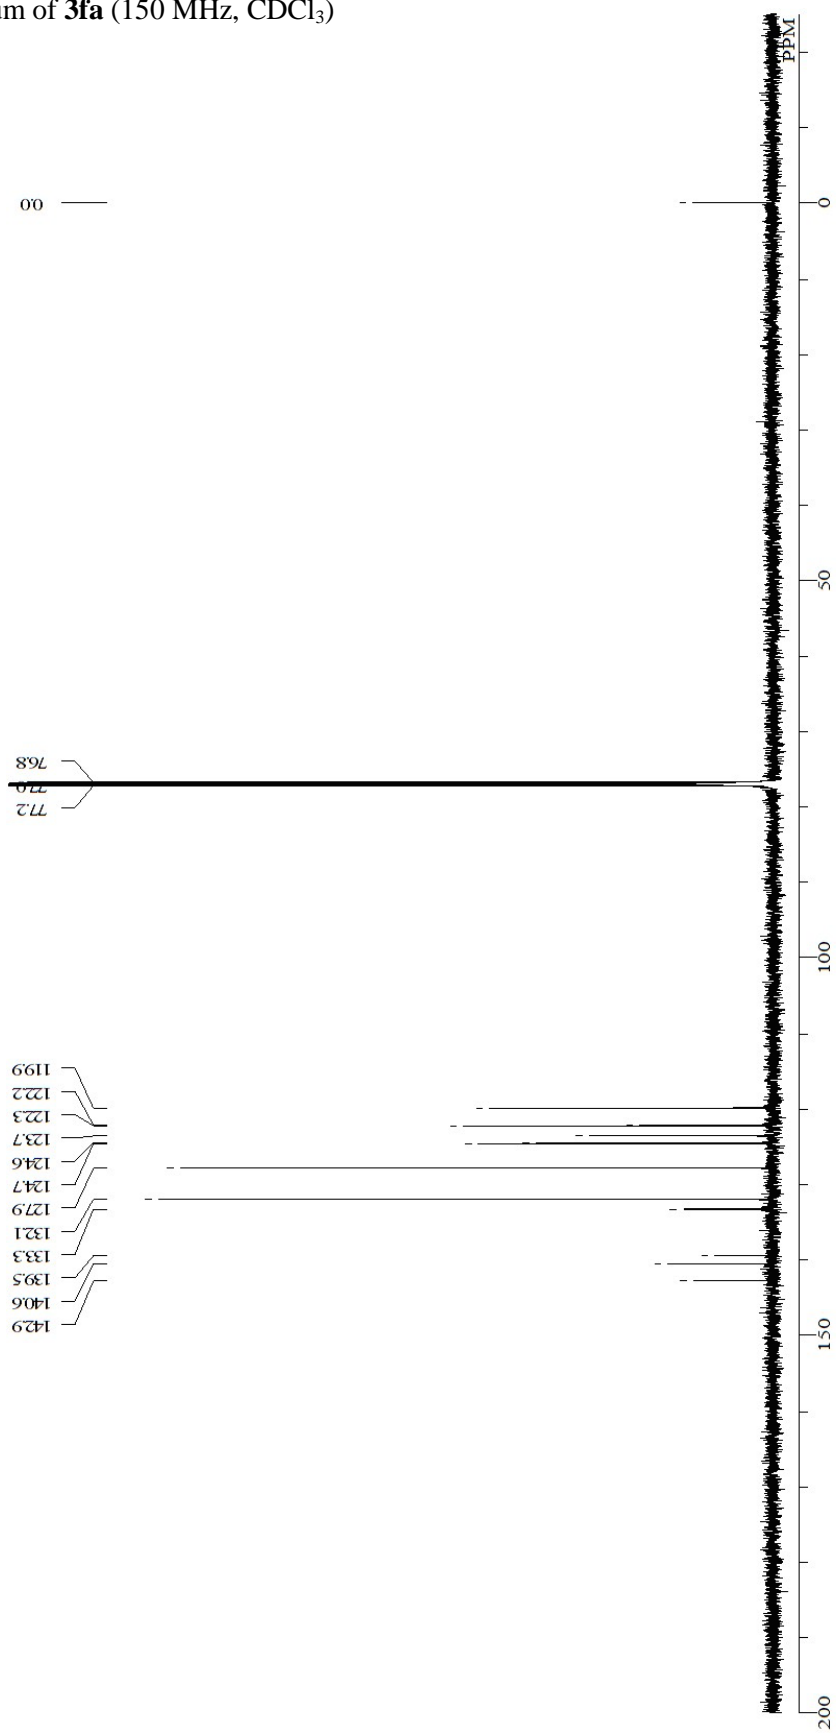

Supplement: Additional file 1 [file 1860-5397-11-295-S1.pdf]
